# Supplementary material for: Organic Matter Transformations are Disconnected Between Surface Water and the Hyporheic Zone
Source: Copernicus journal article supplement (doi:10.5194/bg-2022-19), 2022-02-22

## Supplementary Figures

**Title:** Organic Matter Transformations are Disconnected Between Surface Water and the Hyporheic Zone

**Authors:** James C. Stegen<sup>1</sup>, Sarah J. Fansler<sup>1</sup>, Malak M. Tfaily<sup>4</sup>, Vanessa A. Garayburu-Caruso<sup>1</sup>, Amy E. Goldman<sup>3</sup>, Robert E. Danczak<sup>1</sup>, Rosalie K. Chu<sup>2</sup>, Lupita Renteria<sup>1</sup>, Jerry Tagestad<sup>3</sup>, Jason Toyoda<sup>2</sup>

<sup>1</sup>Earth and Biological Sciences Directorate, Pacific Northwest National Laboratory, Richland, WA, U.S.A; [james.stegen@pnnl.gov](mailto:james.stegen@pnnl.gov) (J.C.S.); [sarah.fansler@pnnl.gov](mailto:sarah.fansler@pnnl.gov) (S.J.F.); [vanessa.garayburu-caruso@pnnl.gov](mailto:vanessa.garayburu-caruso@pnnl.gov) (V.A.G-C.); [robert.danczak@pnnl.gov](mailto:robert.danczak@pnnl.gov) (R.E.D.); [lupita.renteria@pnnl.gov](mailto:lupita.renteria@pnnl.gov) (L.R.);

<sup>2</sup>Environmental Molecular Sciences Laboratory, Richland, WA 99352, USA; [Rosalie.Chu@pnnl.gov](mailto:Rosalie.Chu@pnnl.gov) (R.K.C.); [Jason.Toyoda@pnnl.gov](mailto:Jason.Toyoda@pnnl.gov) (J.T.)

<sup>3</sup>Energy and Environment Directorate, Pacific Northwest National Laboratory, Richland, WA, U.S.A; [amy.goldman@pnnl.gov](mailto:amy.goldman@pnnl.gov) (A.E.G.); [Jerry.Tagestad@pnnl.gov](mailto:Jerry.Tagestad@pnnl.gov) (J.T.)

<sup>4</sup>Department of Environmental Science, University of Arizona, Tucson, AZ, 85719, USA; [tfaily@email.arizona.edu](mailto:tfaily@email.arizona.edu) (M.M.T.)

*Correspondence to:* James C. Stegen ([James.Stegen@pnnl.gov](mailto:James.Stegen@pnnl.gov))

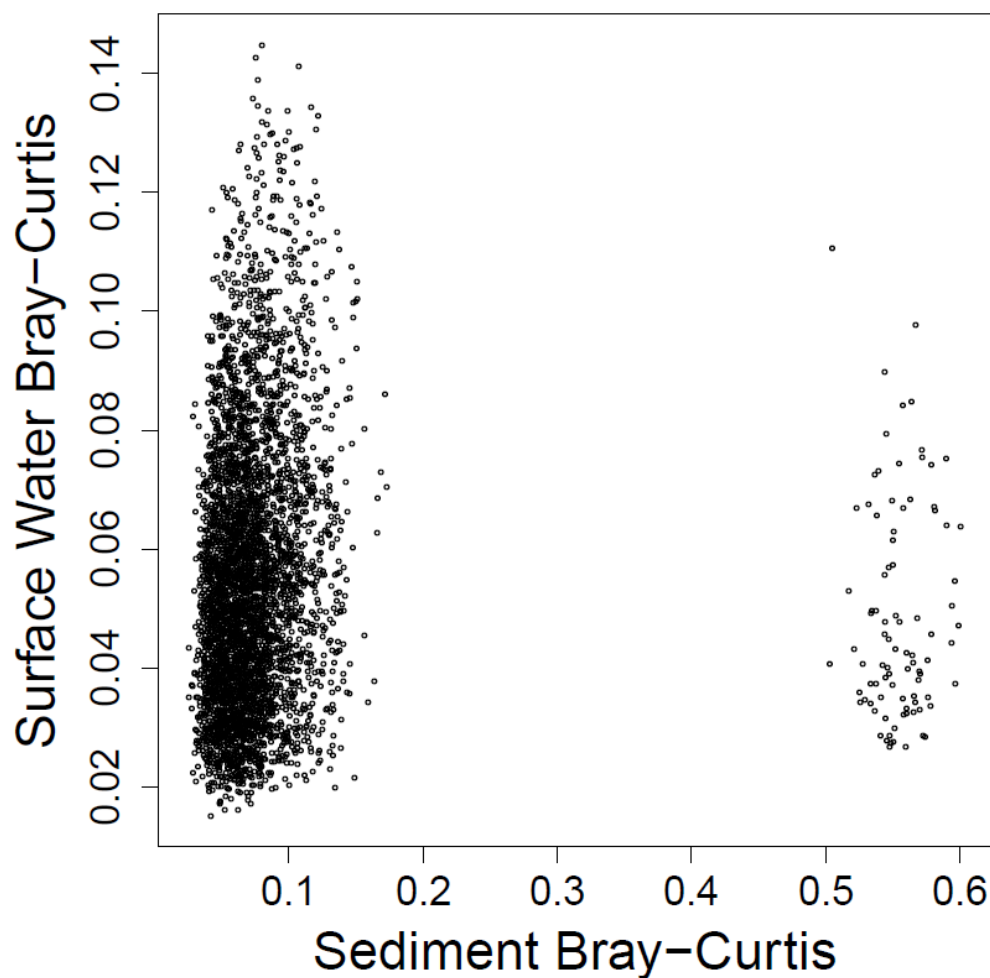

**Figure S1 (above).** Transformation profiles in sediments and surface water were weakly related to each other. Bray-Curtis dissimilarities in surface water and sediments are plotted against each other. Relative to Figure 4, this figure includes all pairwise comparisons for an outlier sample. The conceptual inference remains the same as that from Figure 4; there is no meaningful relationship between surface water and sediment OM transformation profiles.

**Additional Supplementary Figures (below).** Regression analysis for the number of abiotic and biotic transformations related to different potential explanatory variables. Panels use abbreviations and acronyms as follows: sediment (Sed.) and surface water (SW) transformation counts and latitude, longitude, mean annual precipitation (MAP), mean annual temperature (MAT), potential evapotranspiration (PET), and actual evapotranspiration (AET). Each open circle is from one sampling site. Regression statistics are provided on each panel and the solid line represents the regression model, even if it was not significant.

# Sediment

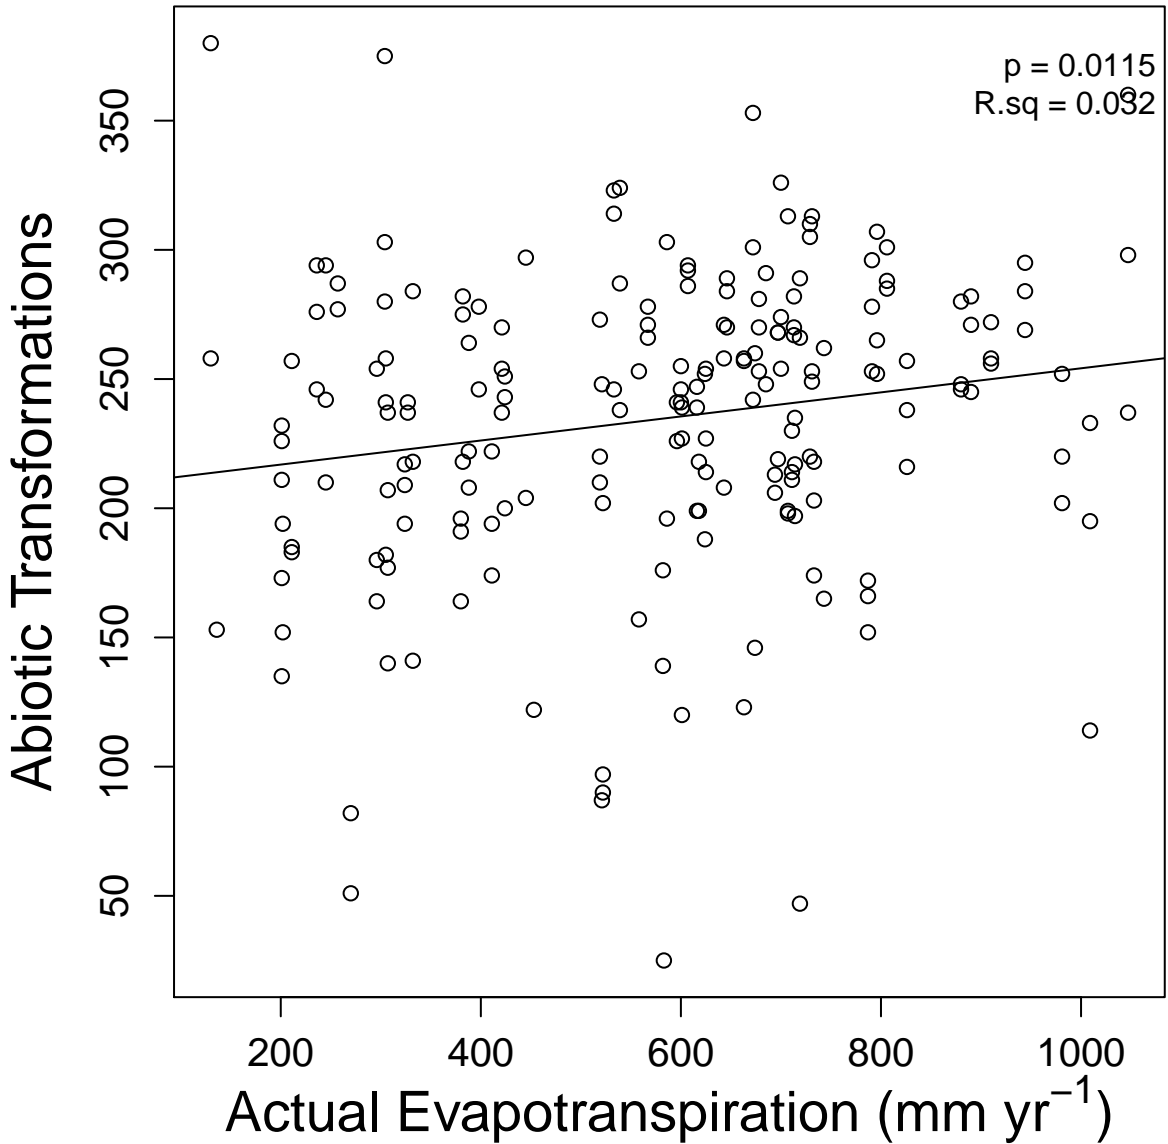

# Surface Water

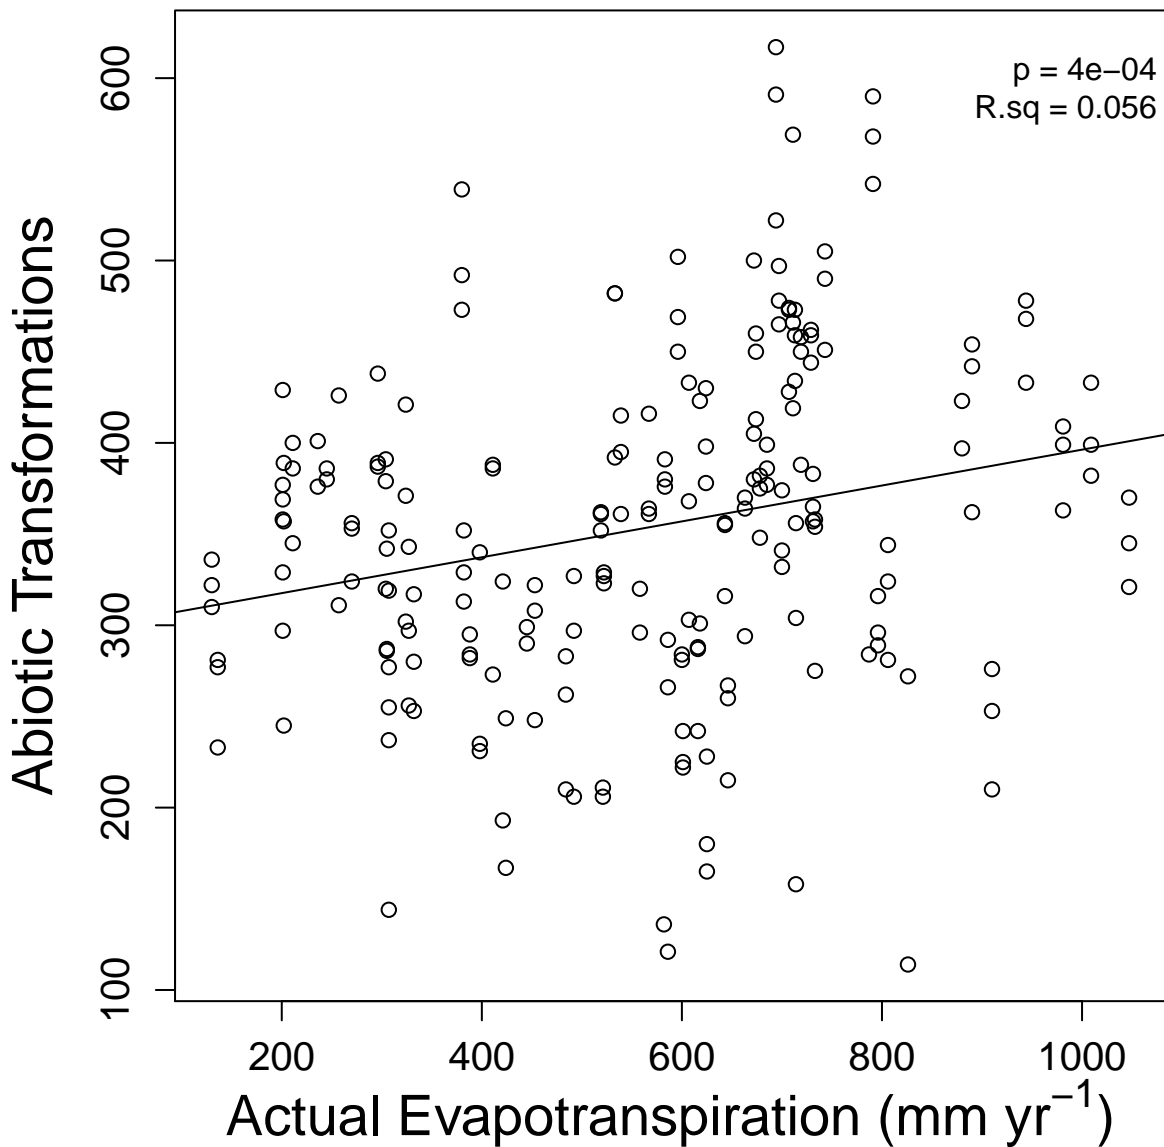

# Sediment

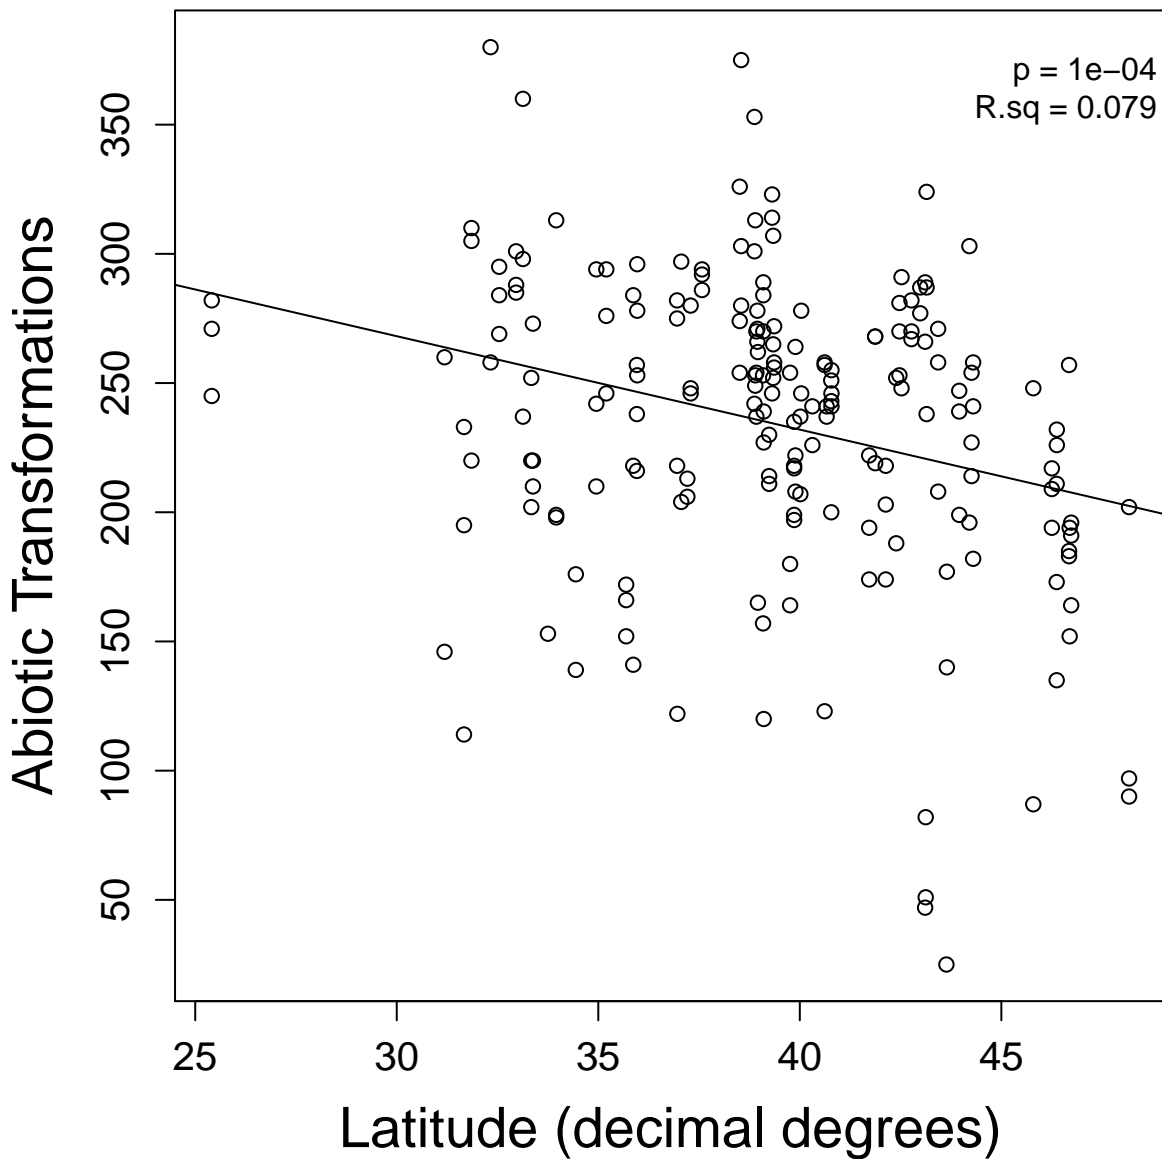

# Surface Water

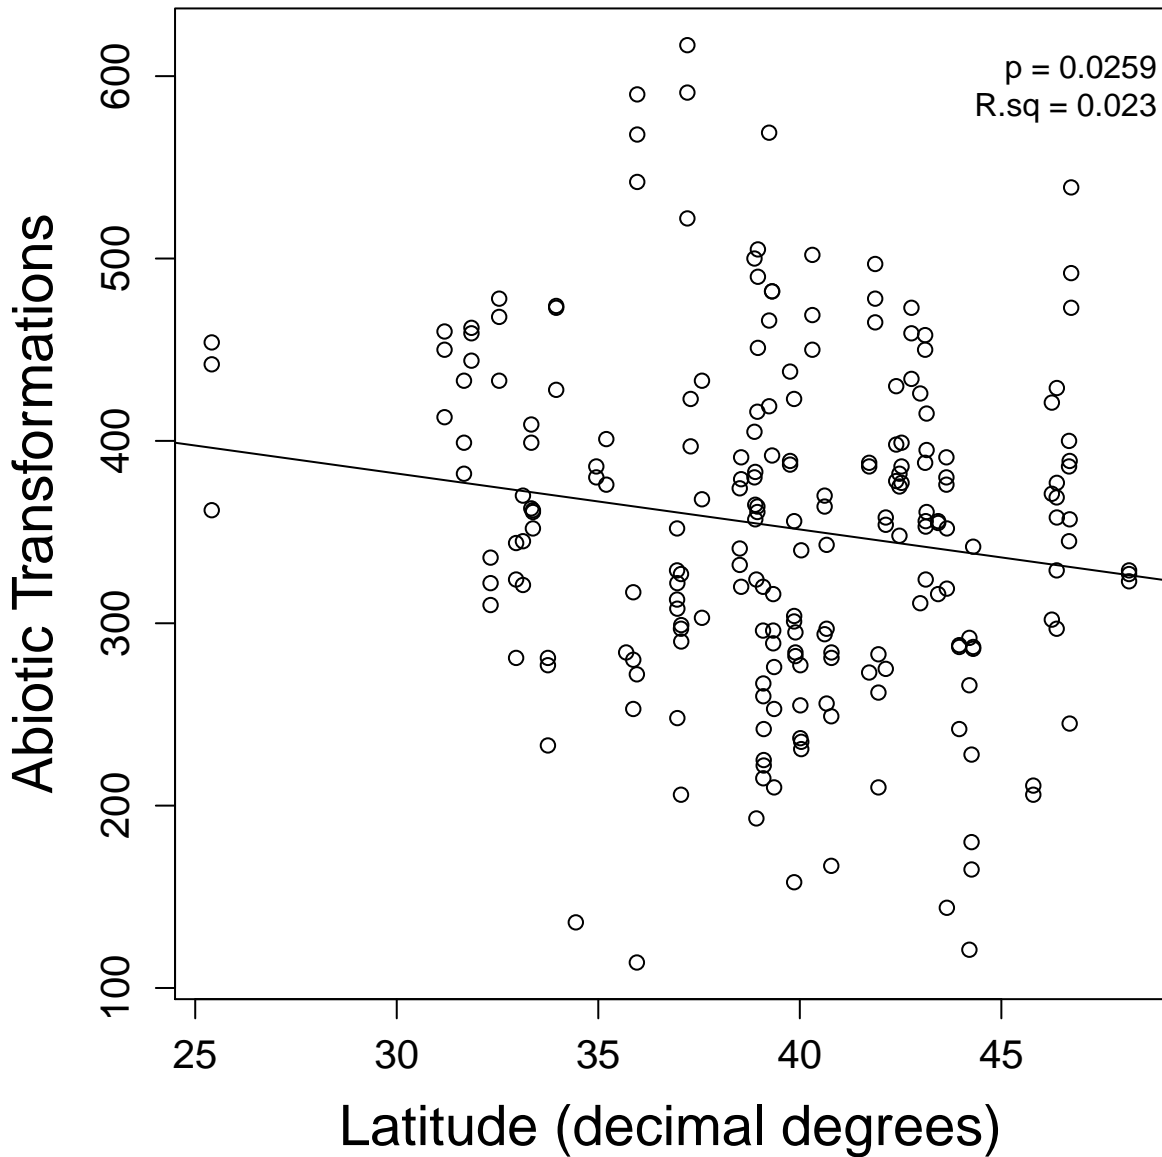

# Sediment

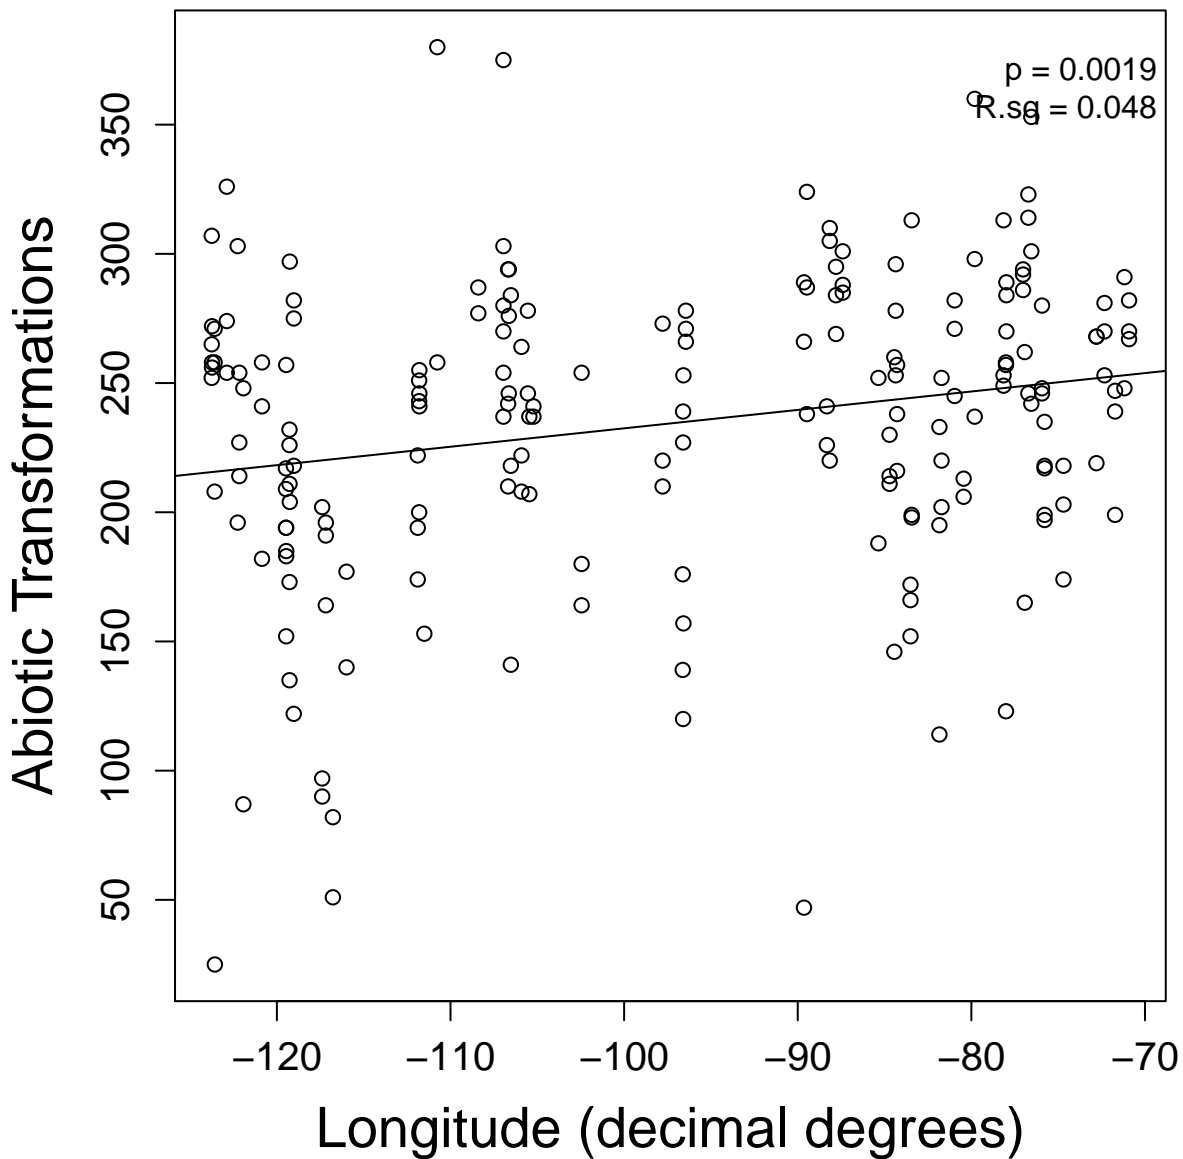

# Surface Water

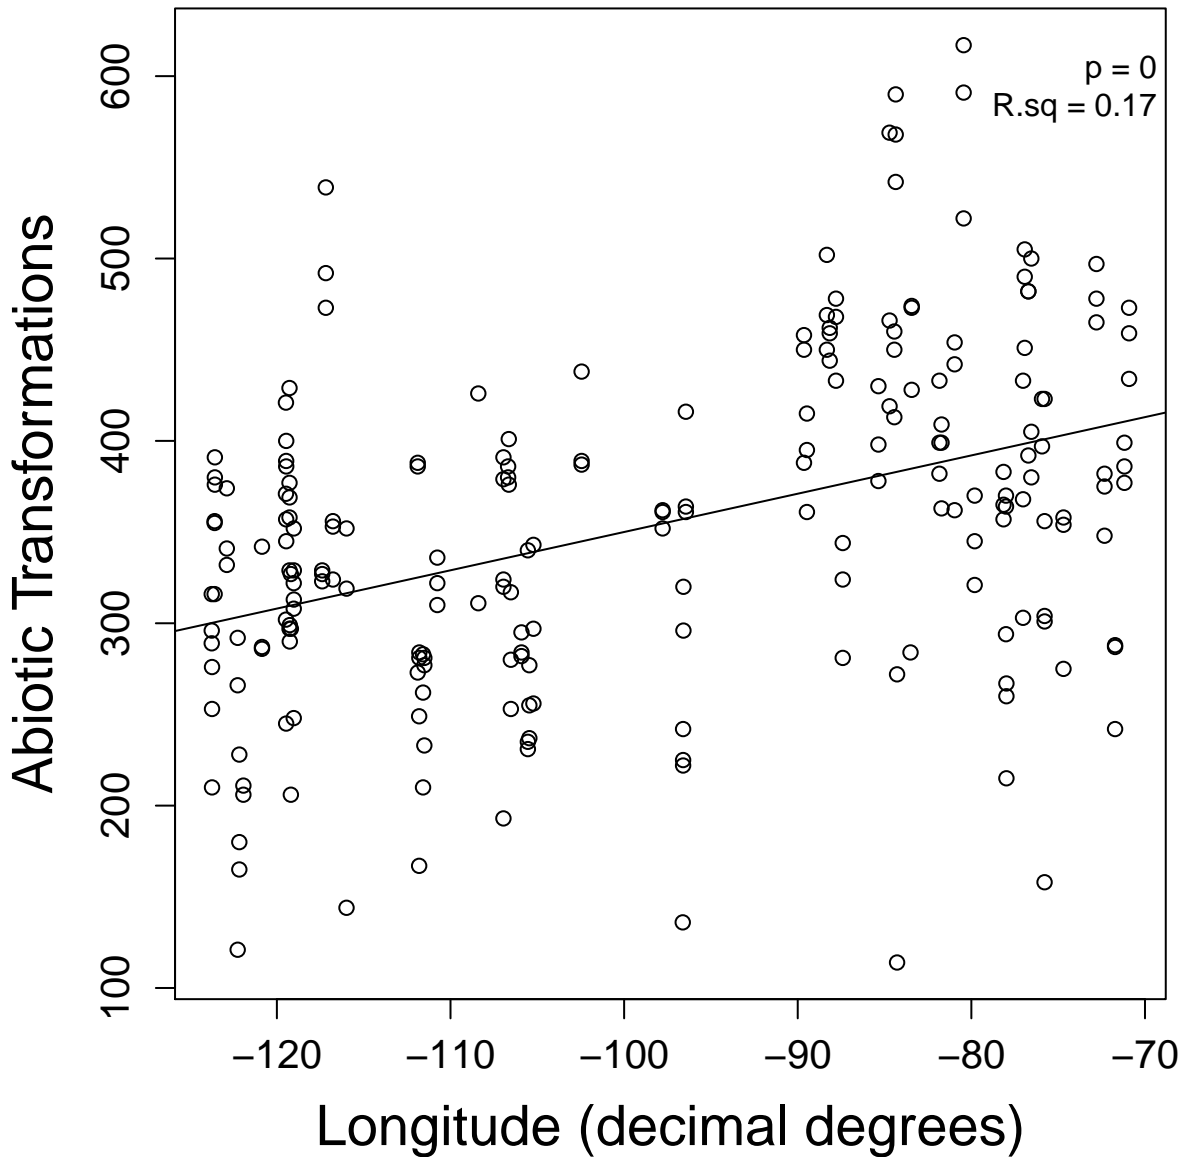



# Sediment

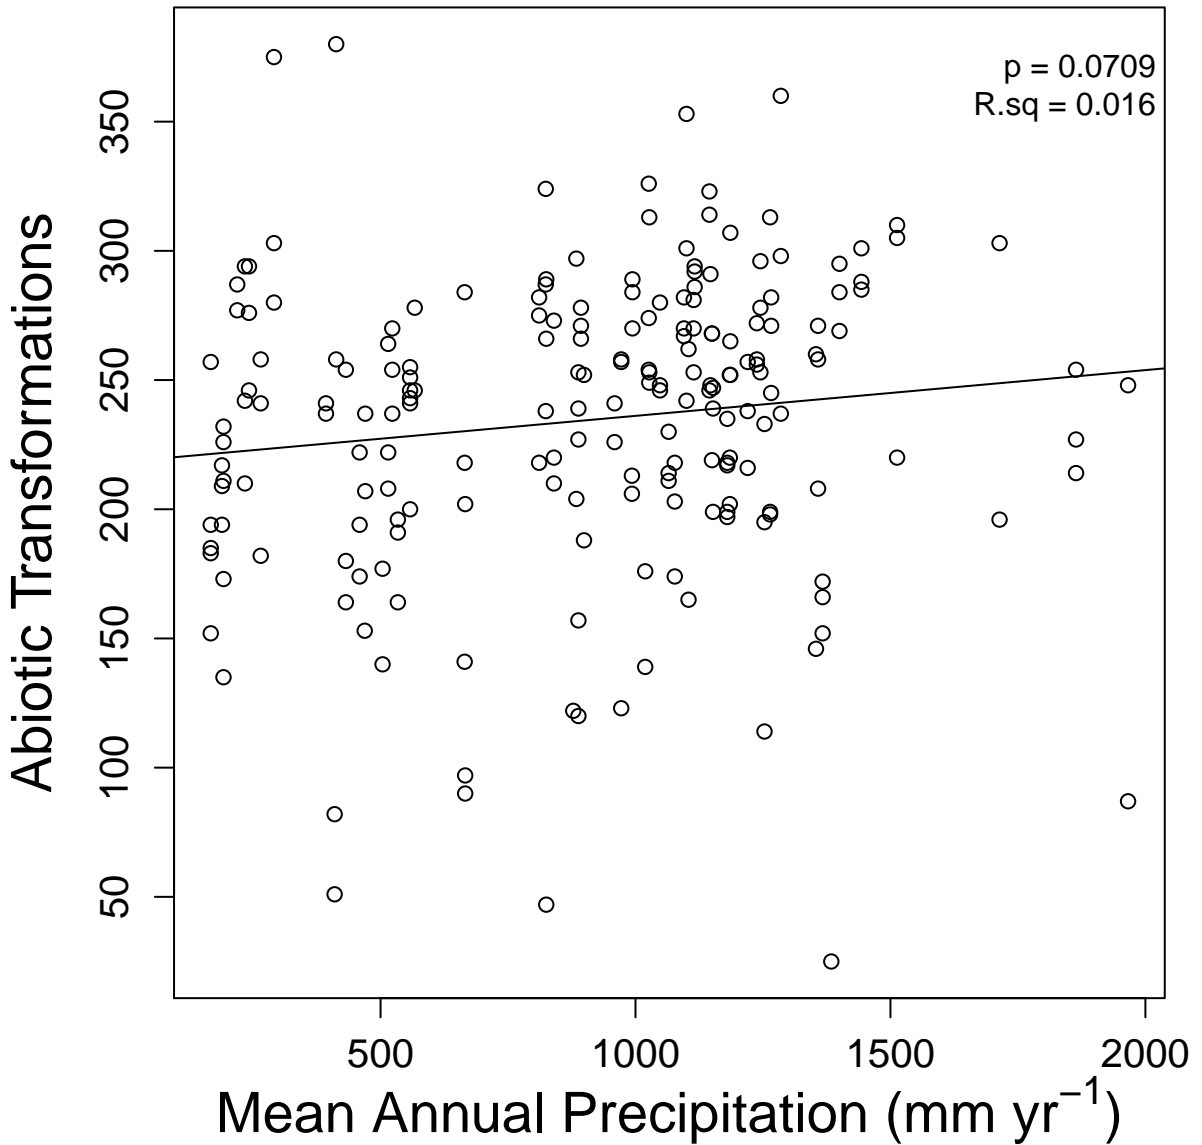

# Surface Water

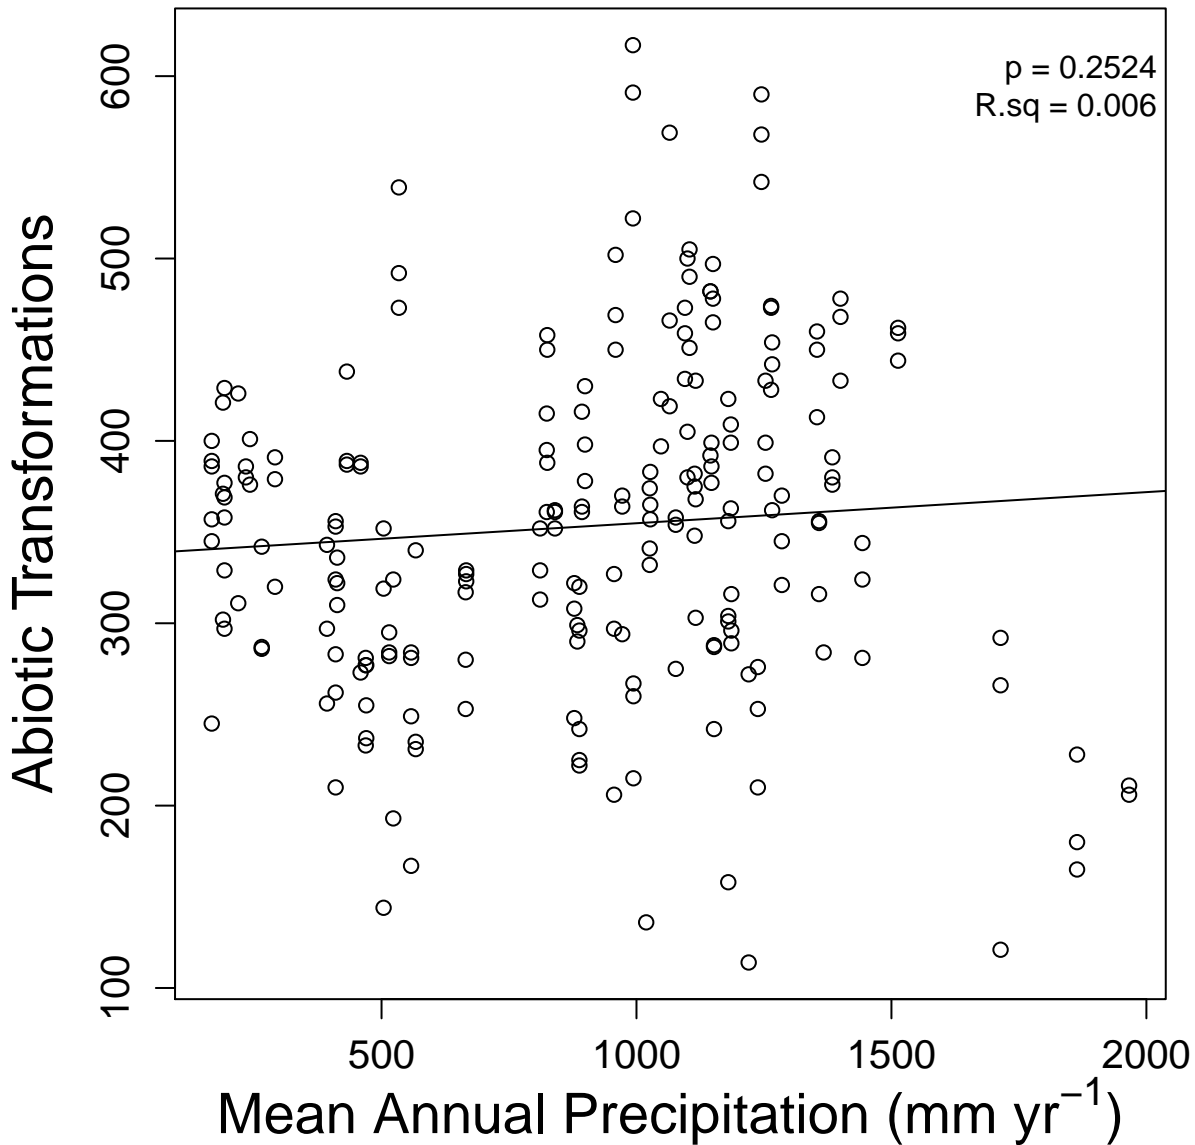

# Sediment

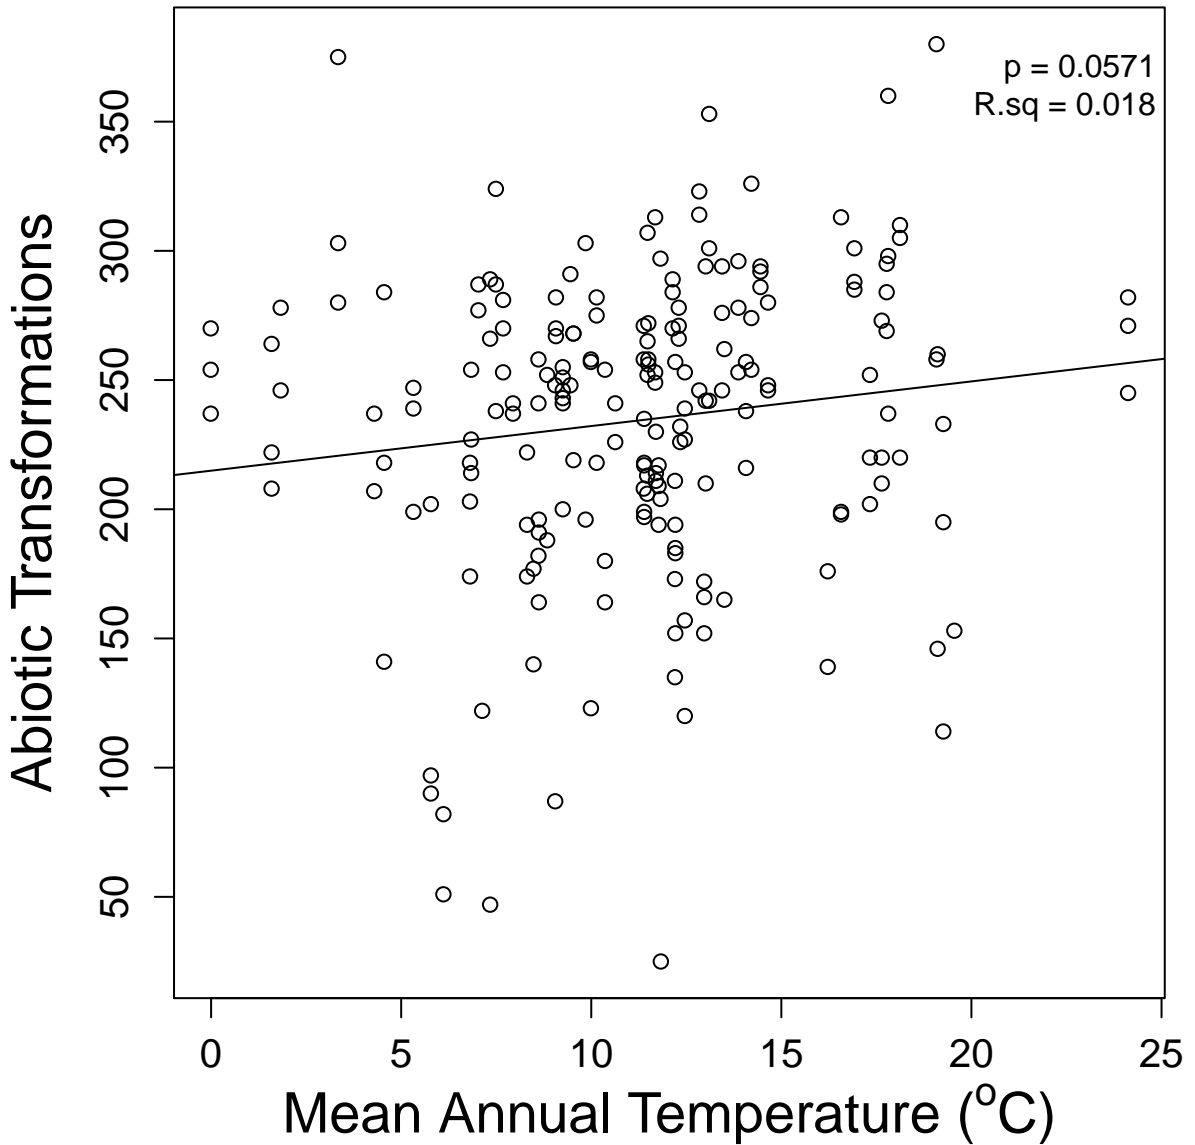

# Surface Water

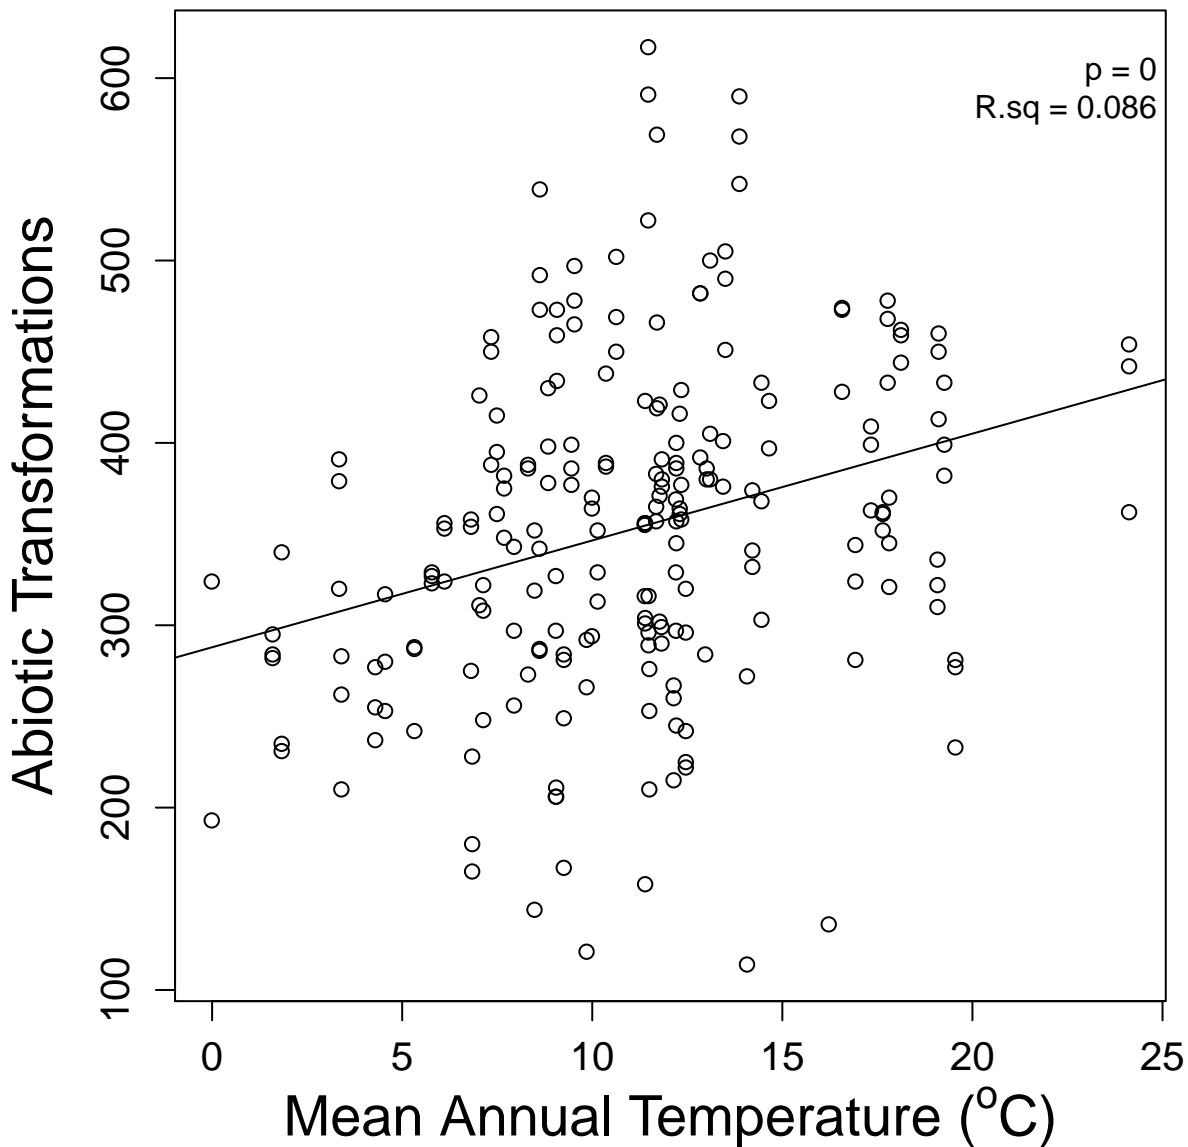

# Sediment

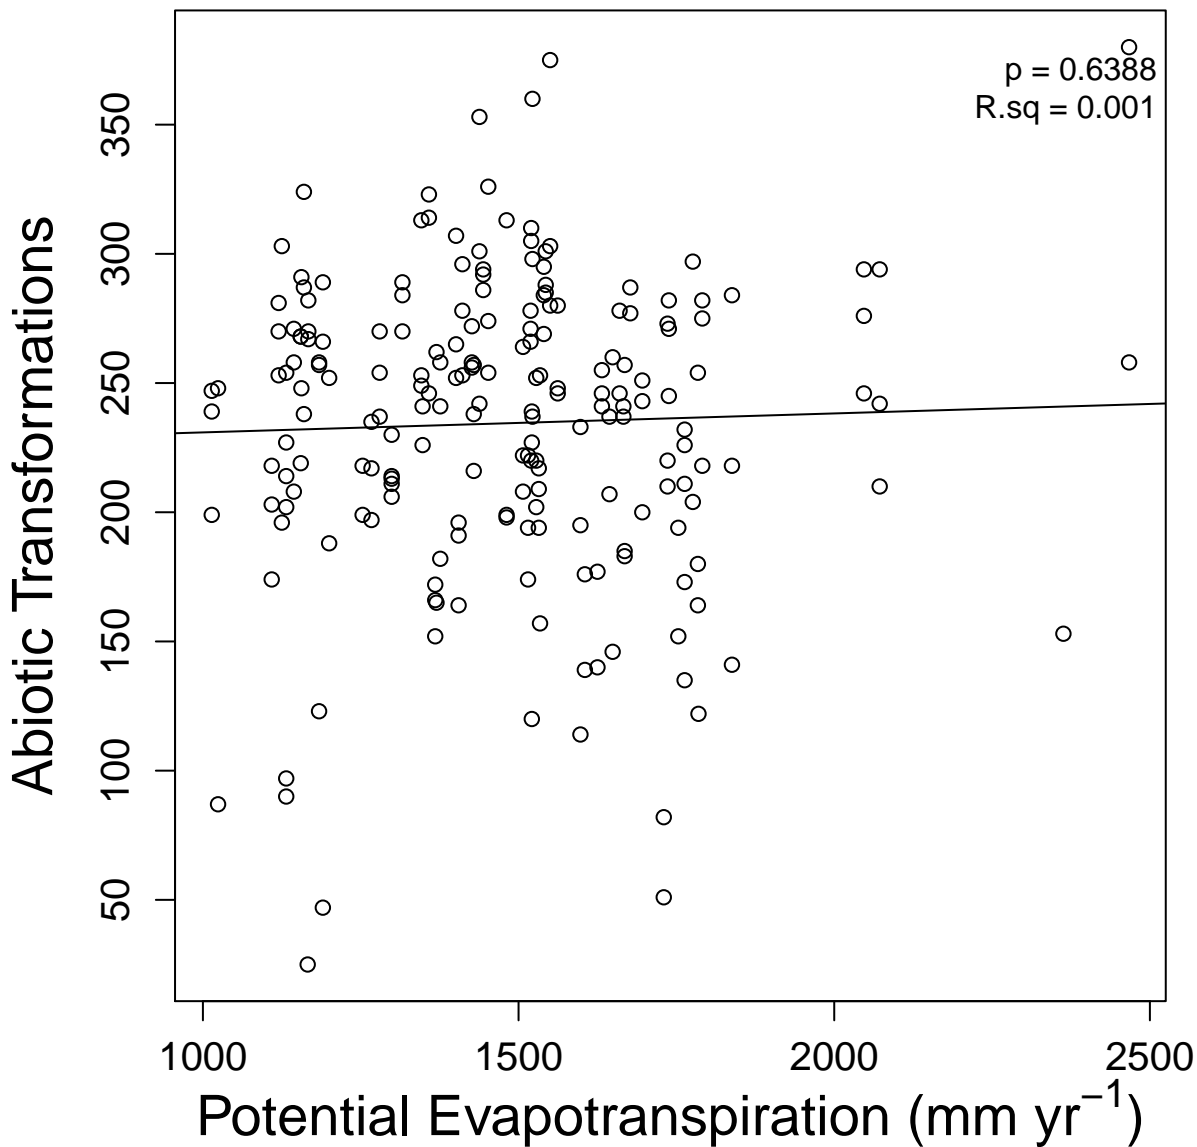

# Surface Water

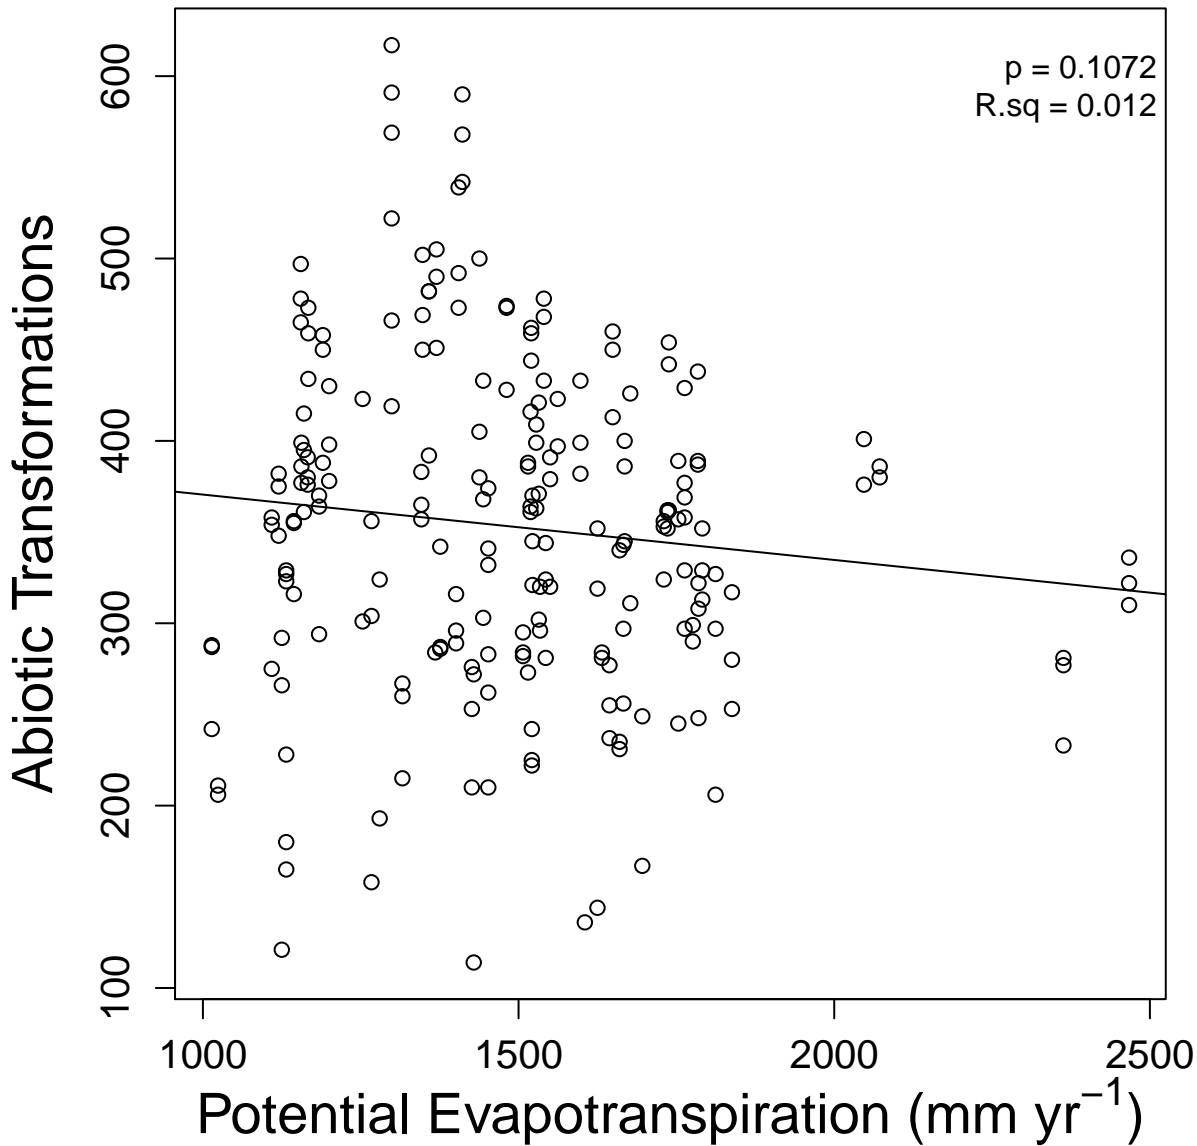

# Sediment

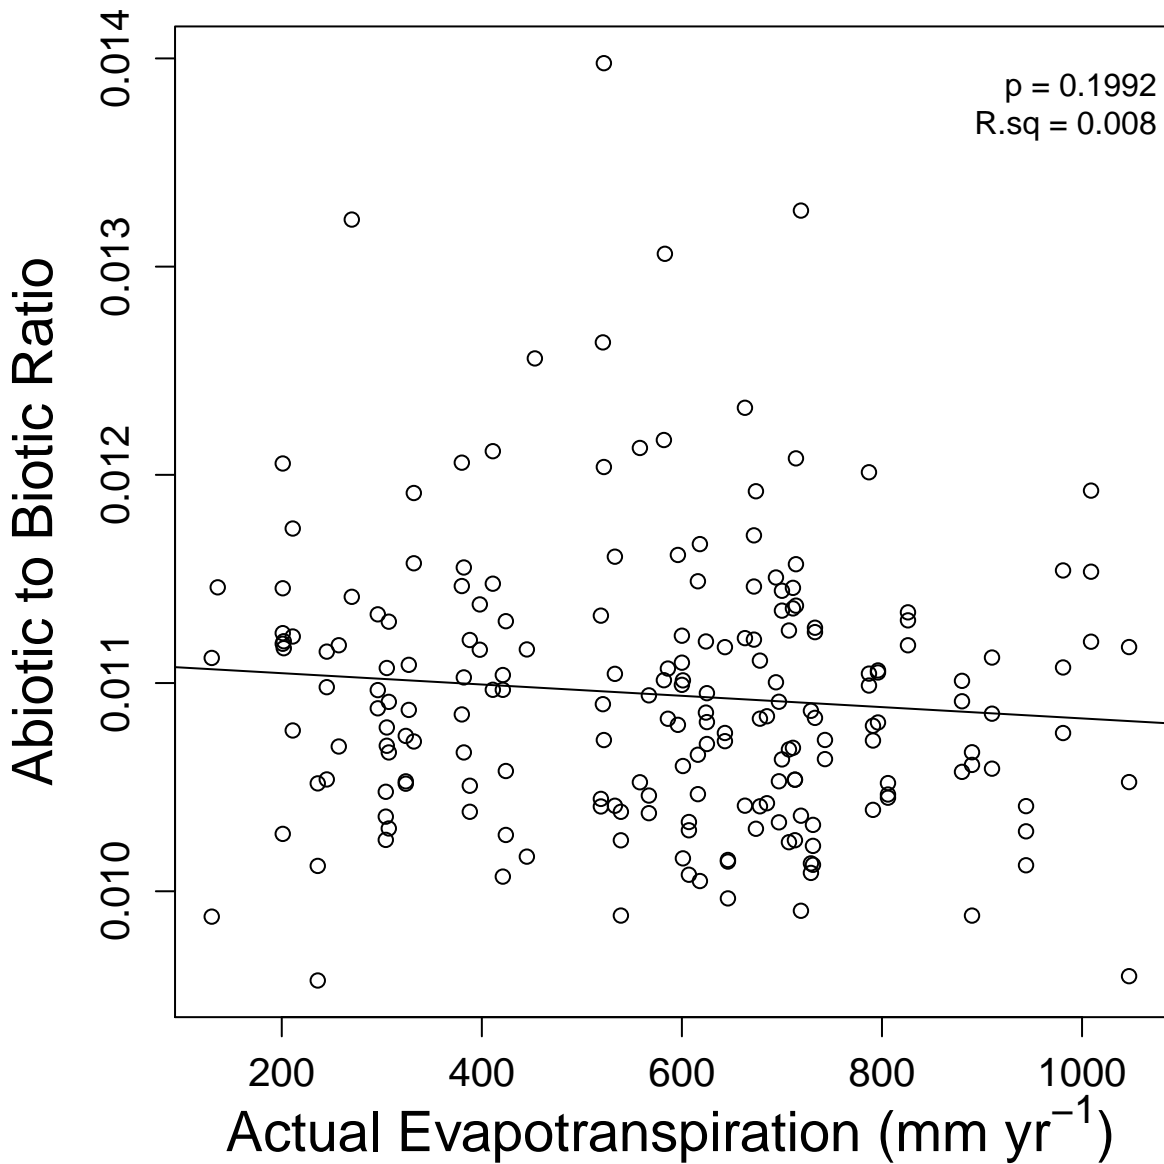

# Surface Water

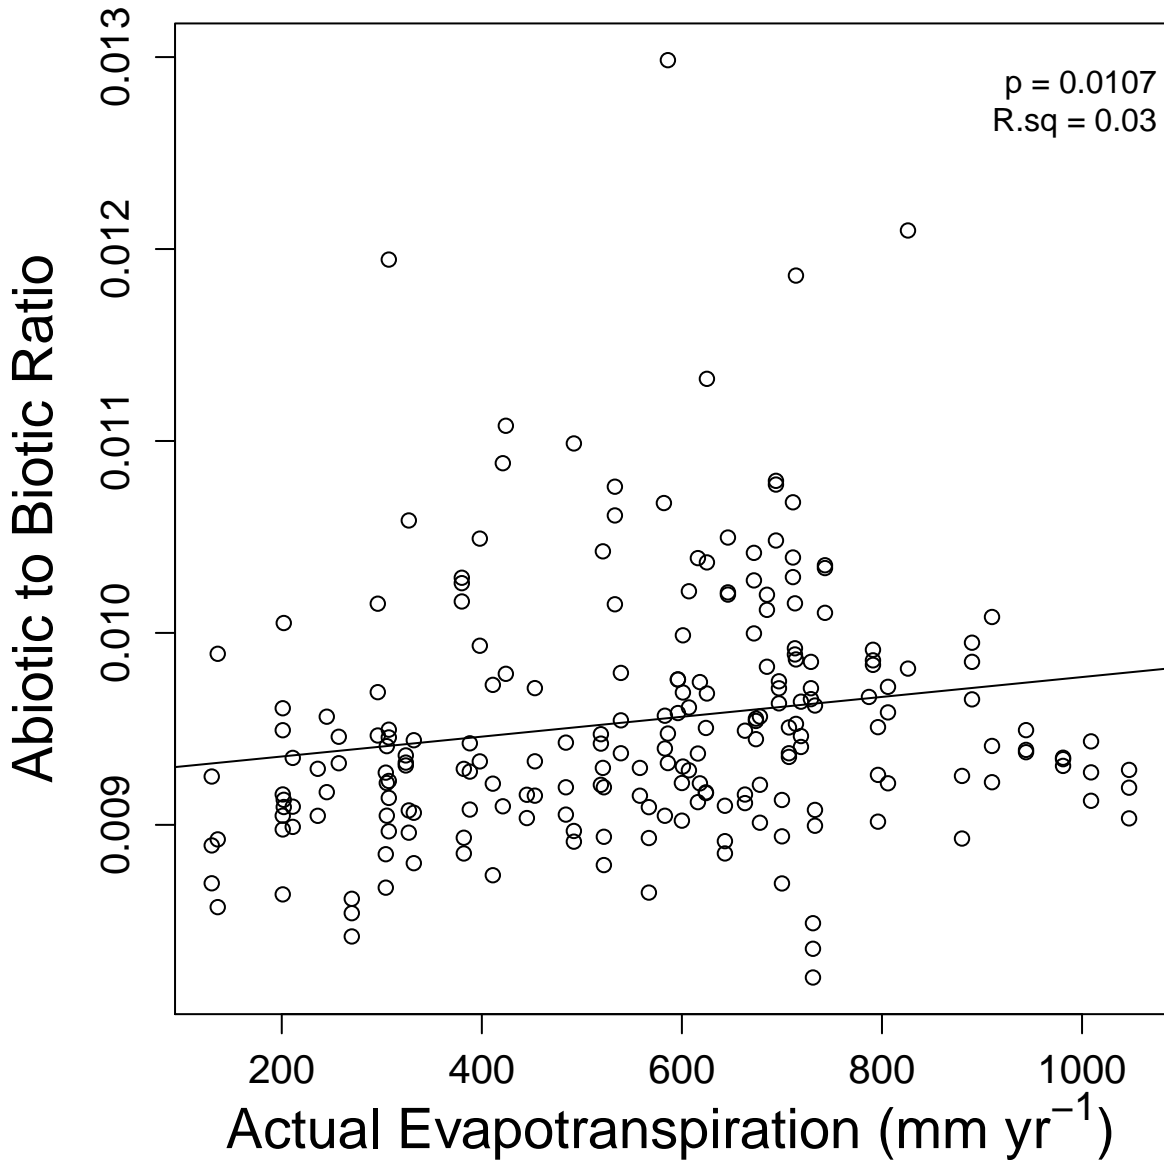



# Sediment

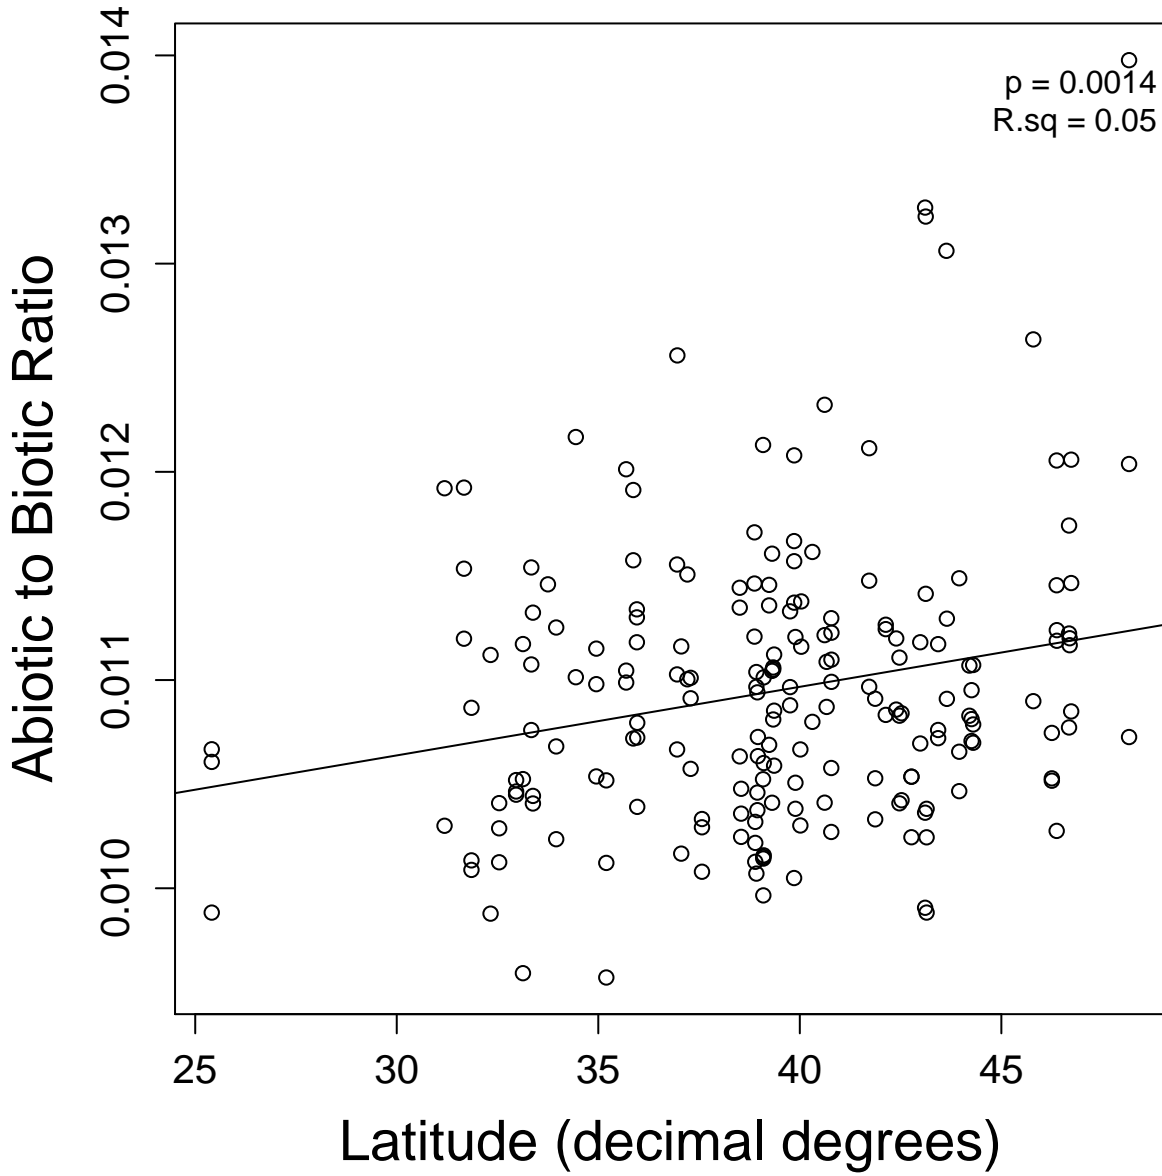

# Surface Water

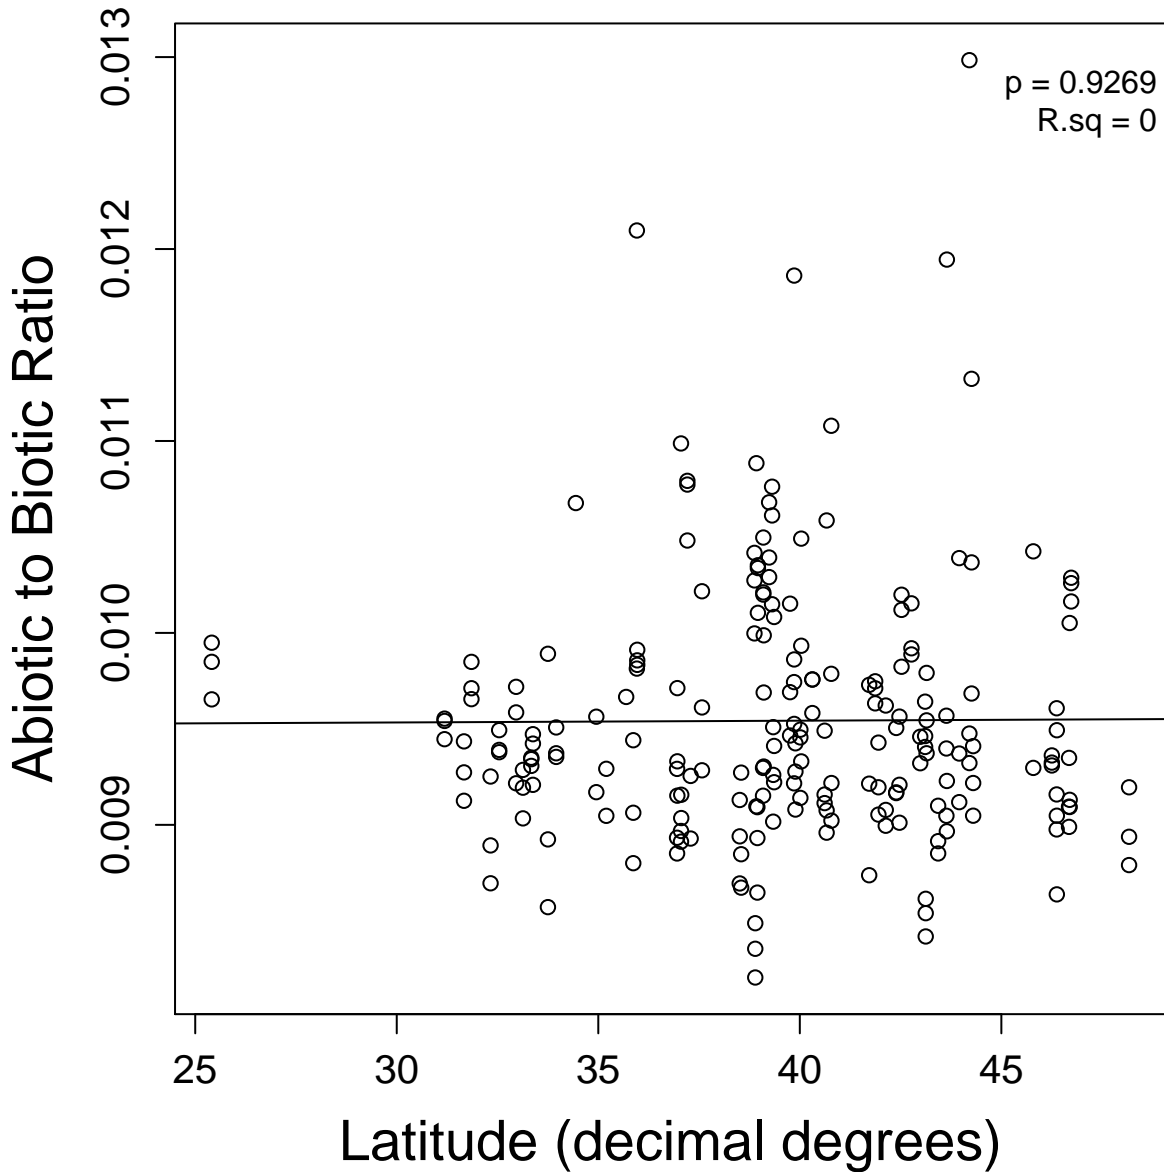

# Sediment

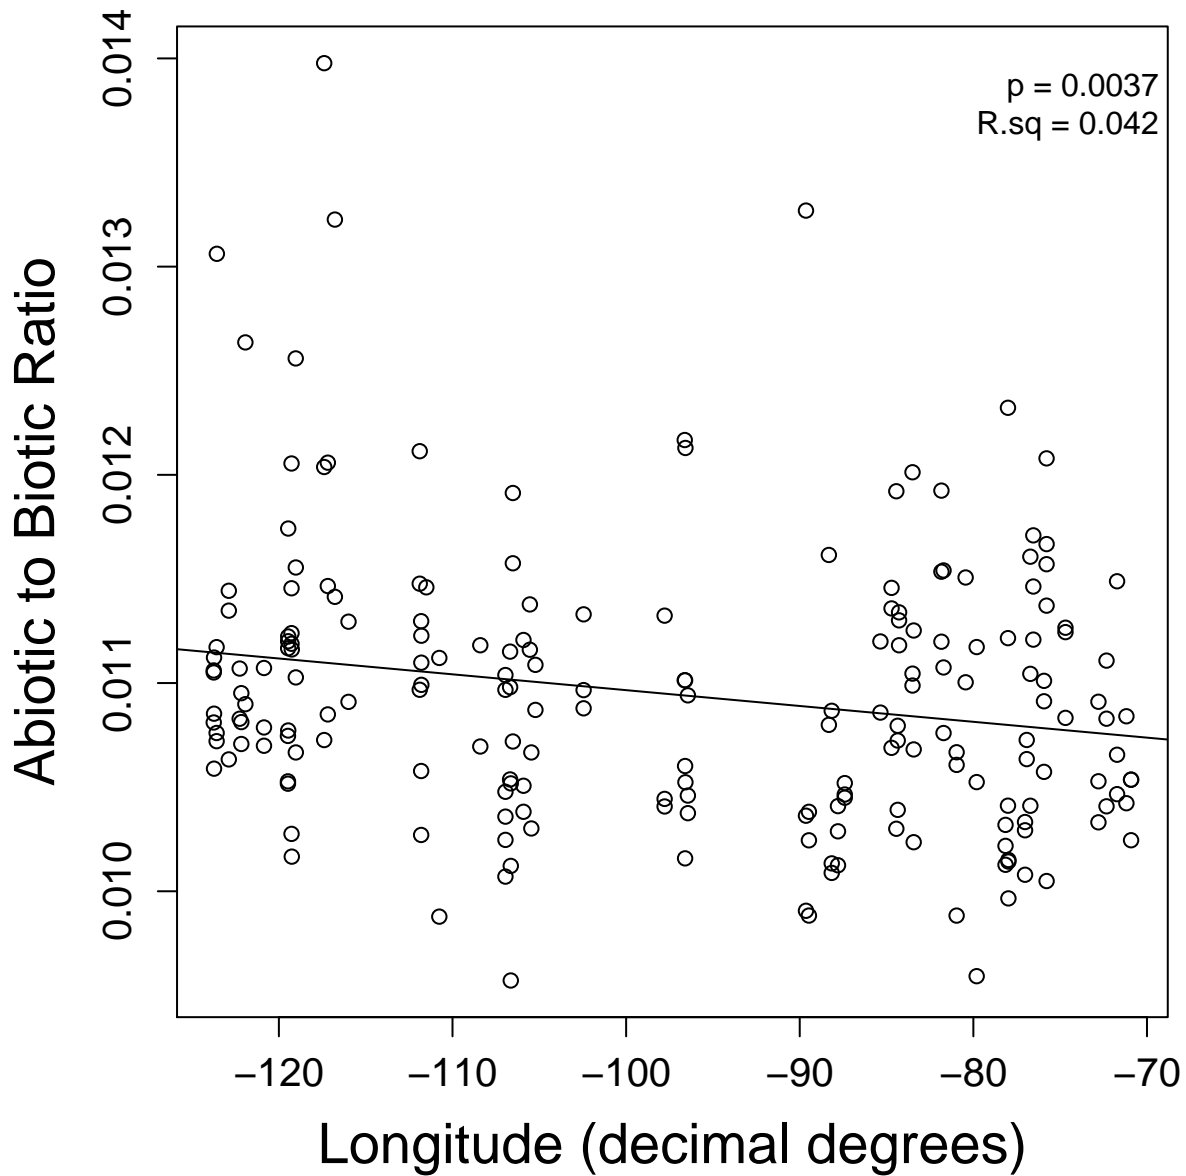

# Surface Water

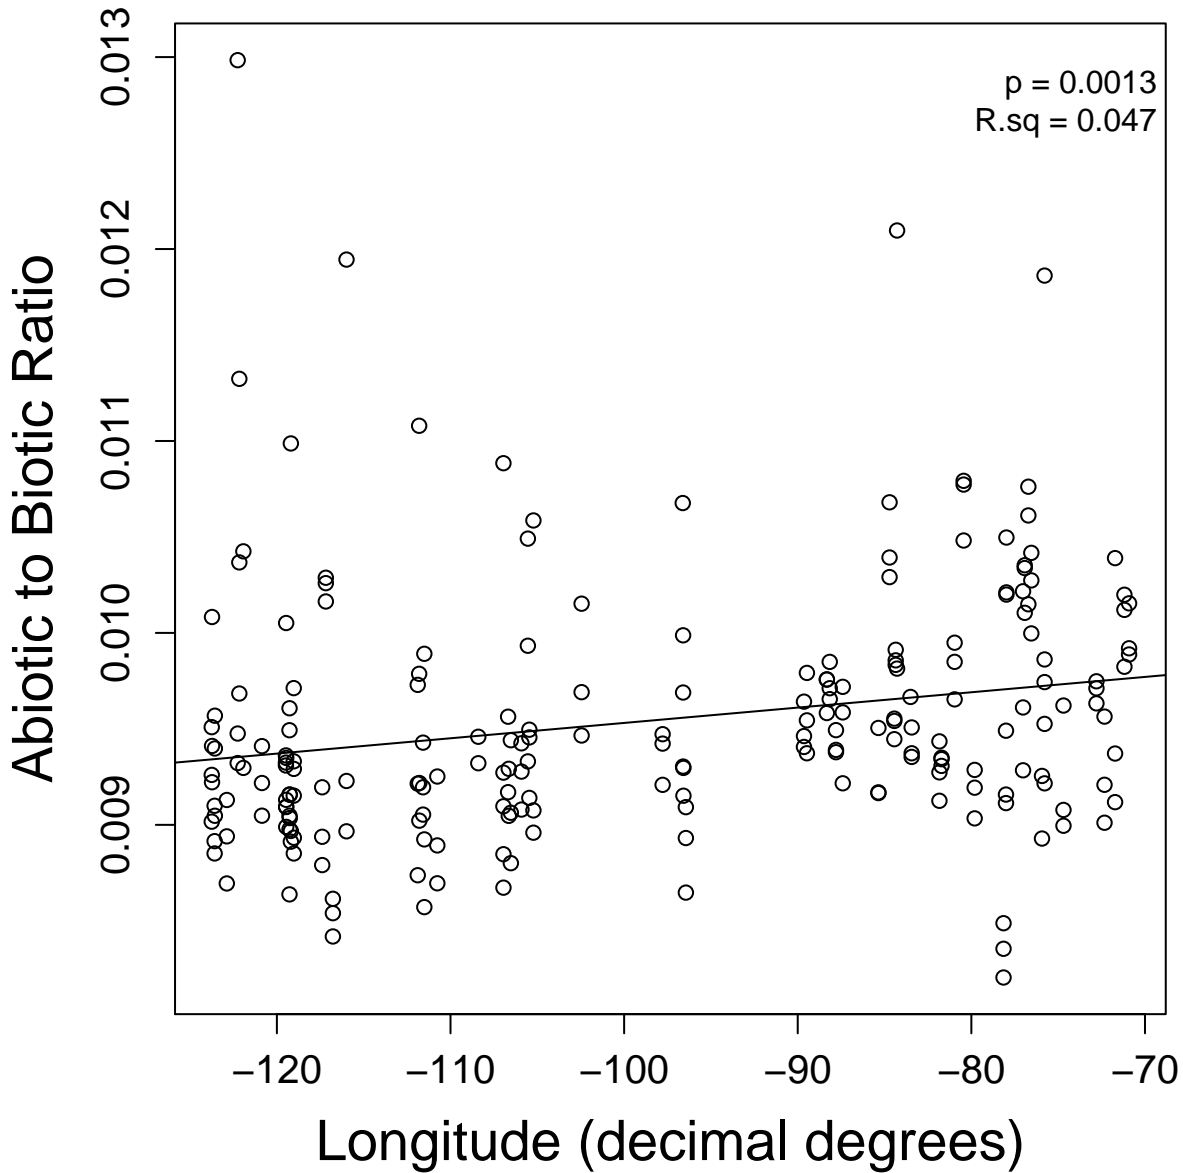

# Sediment

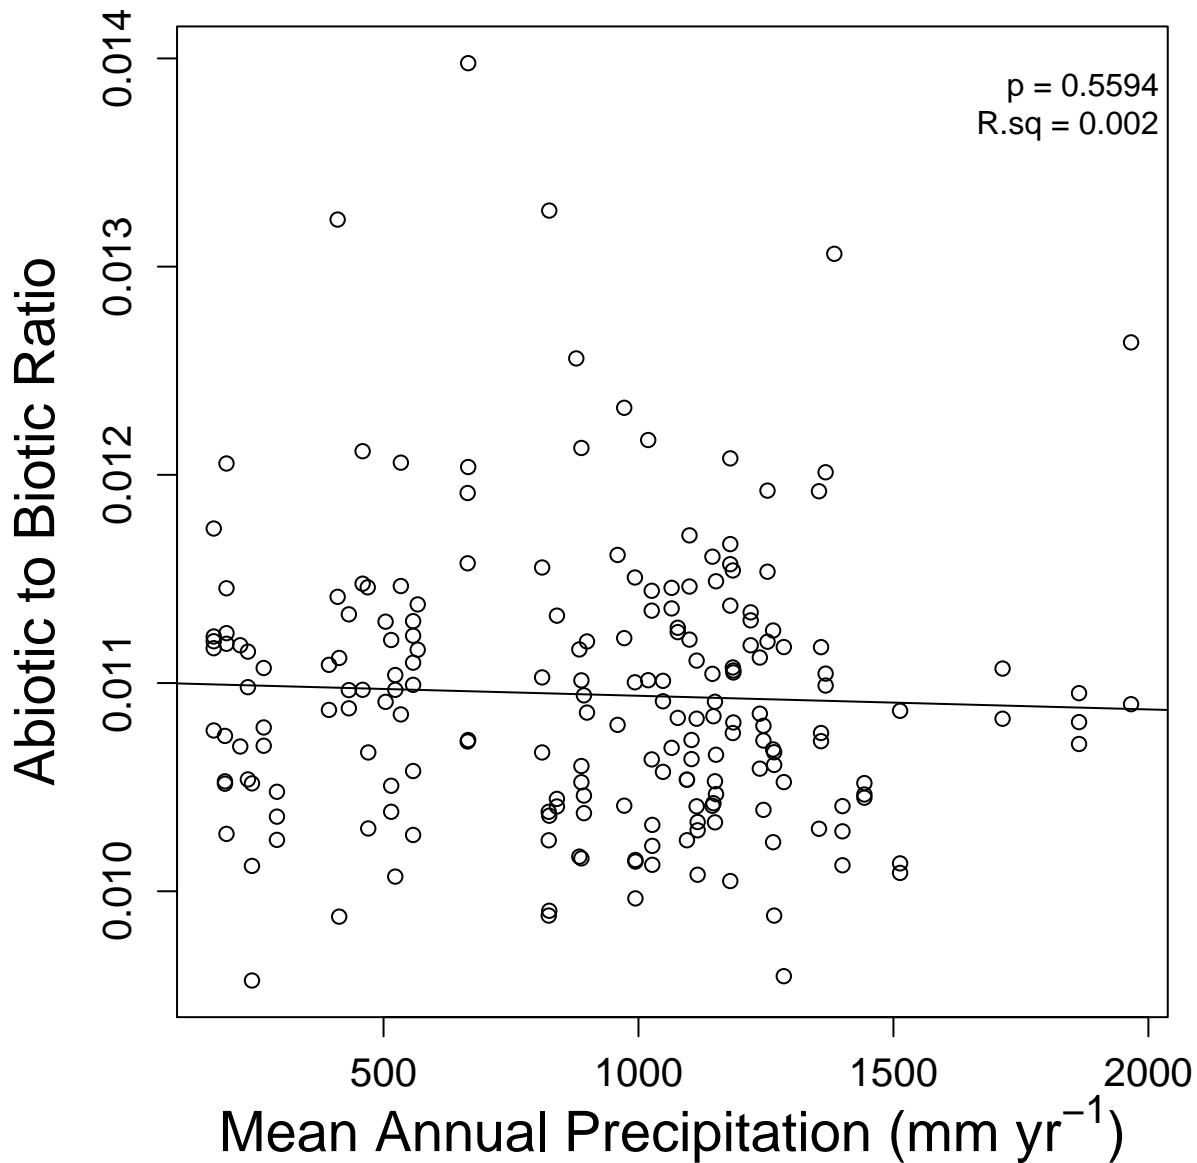

# Surface Water

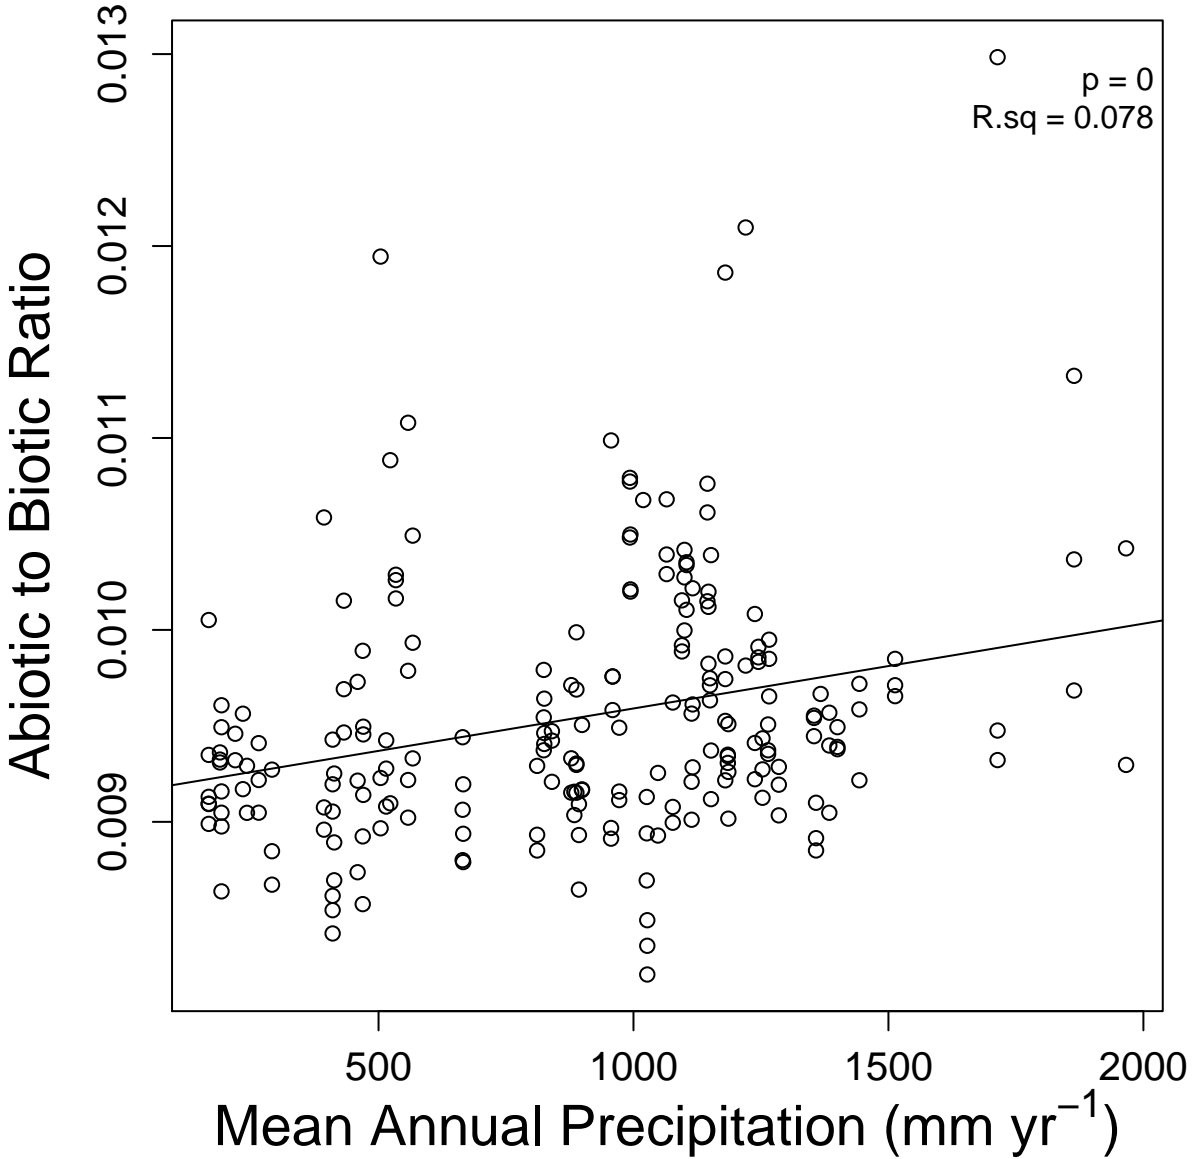

# Sediment

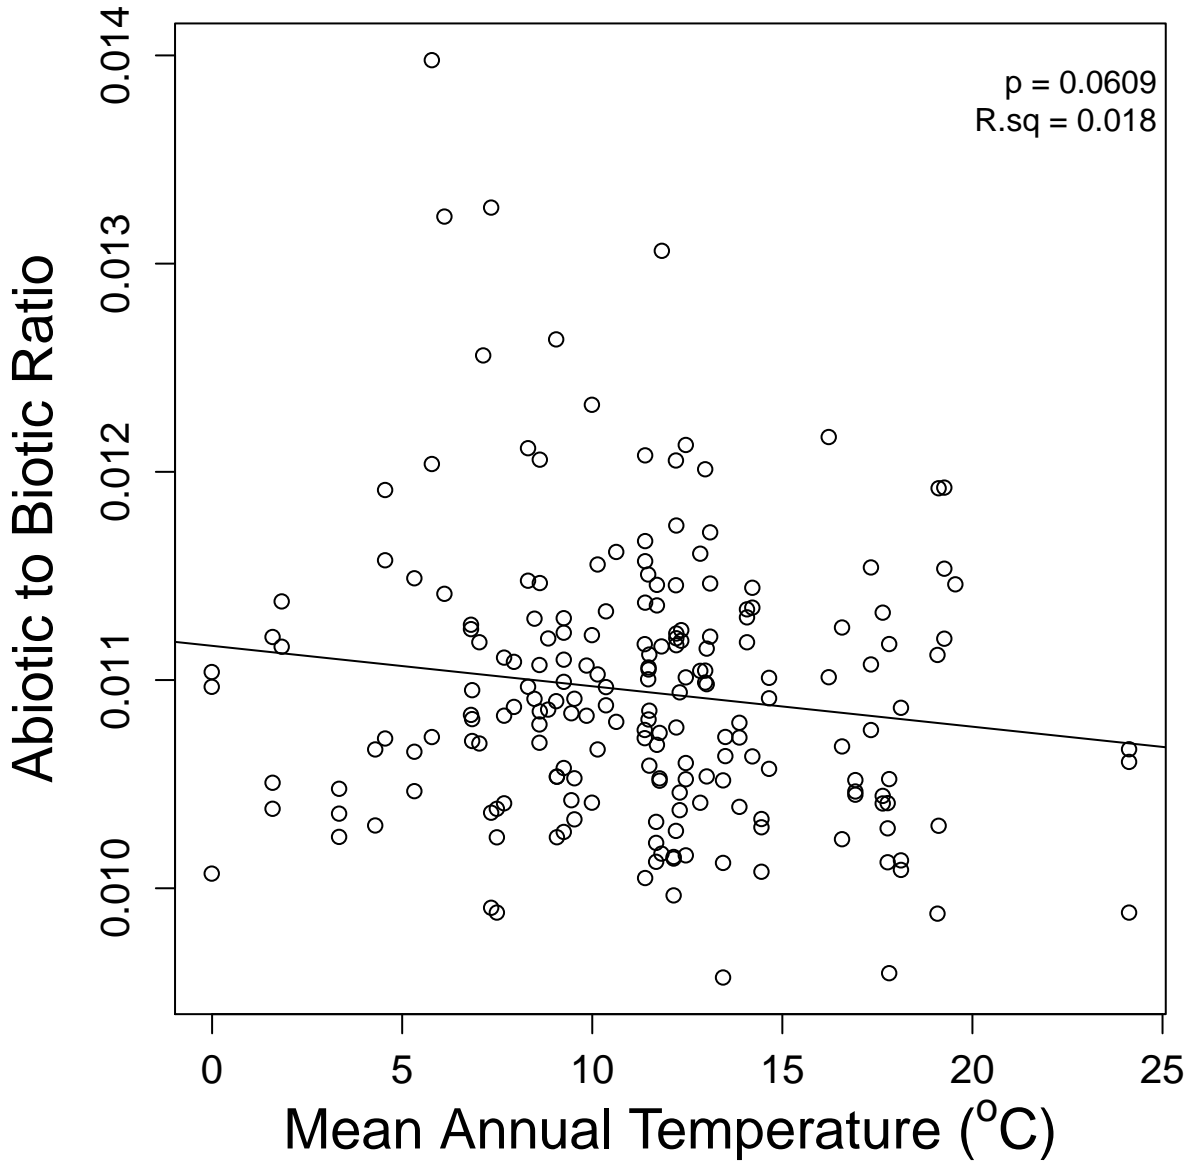

# Surface Water

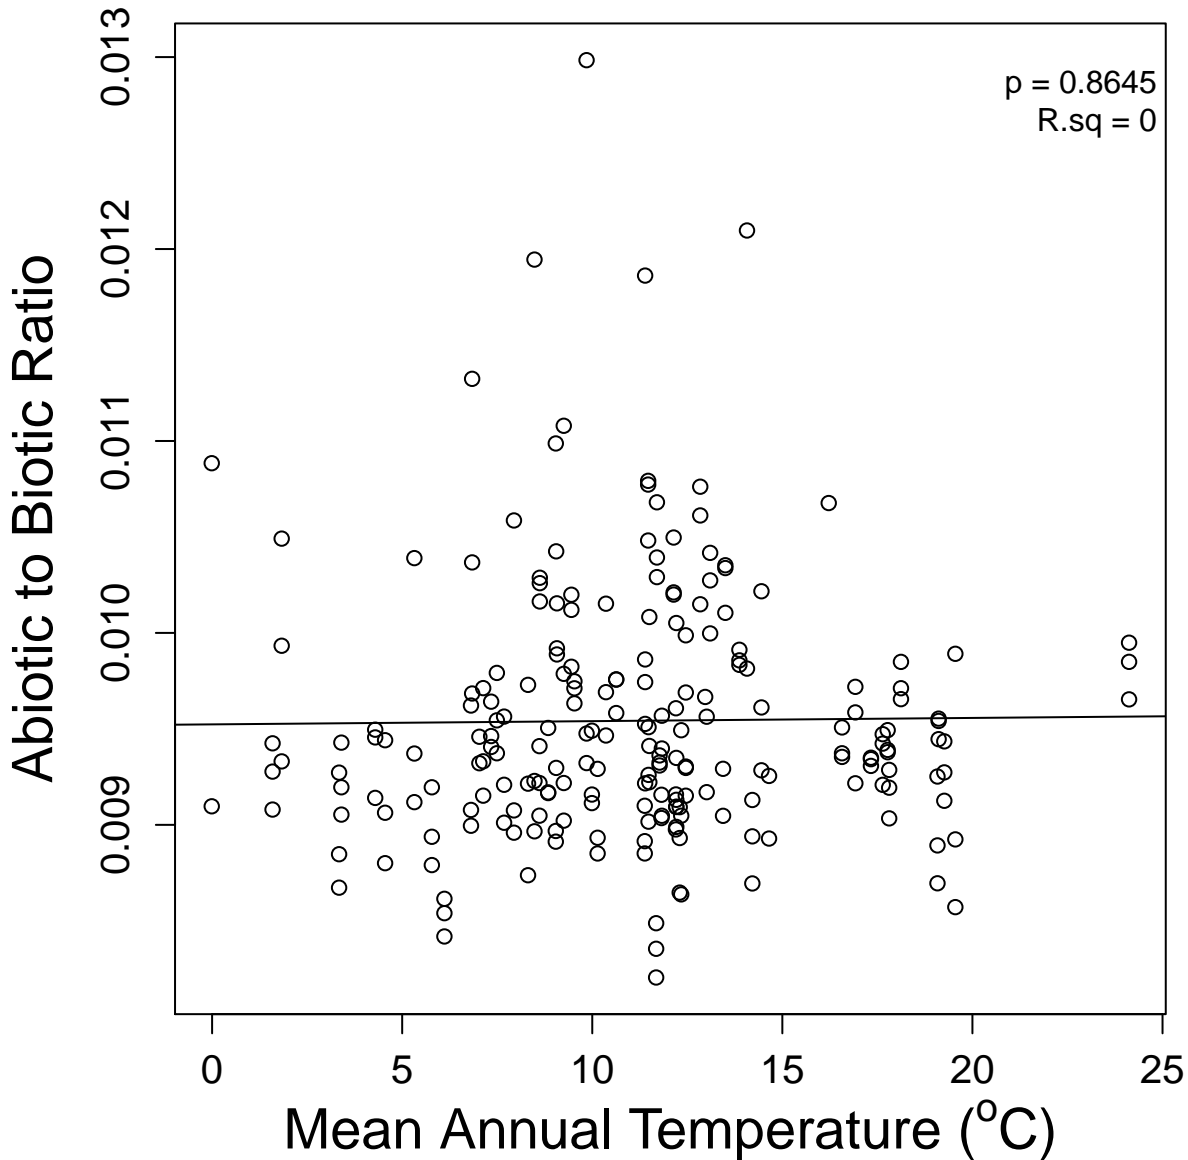



# Sediment

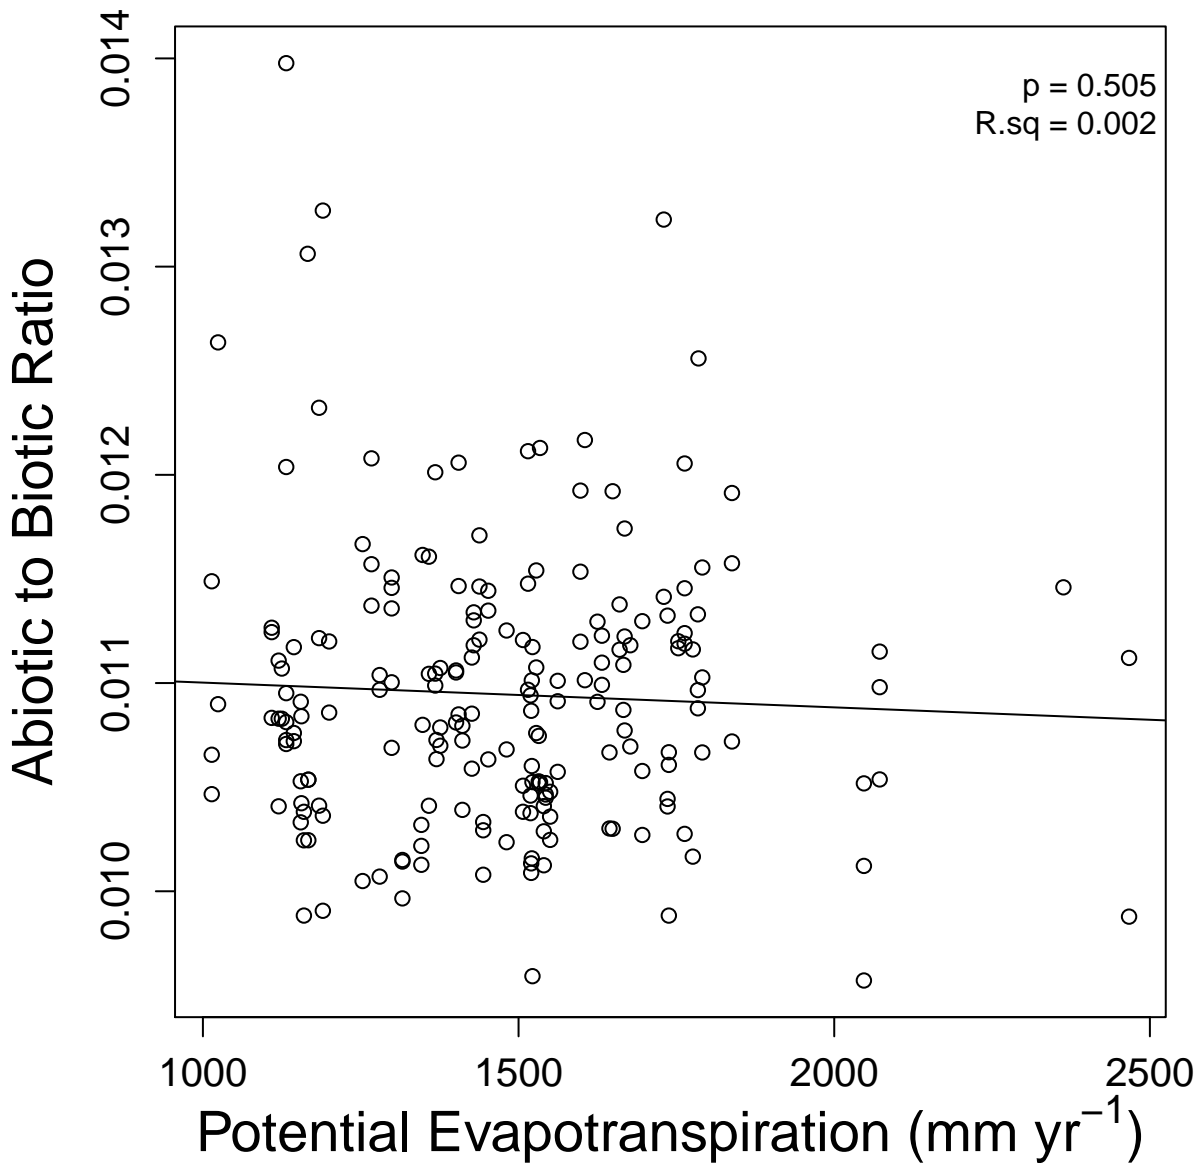

## Surface Water

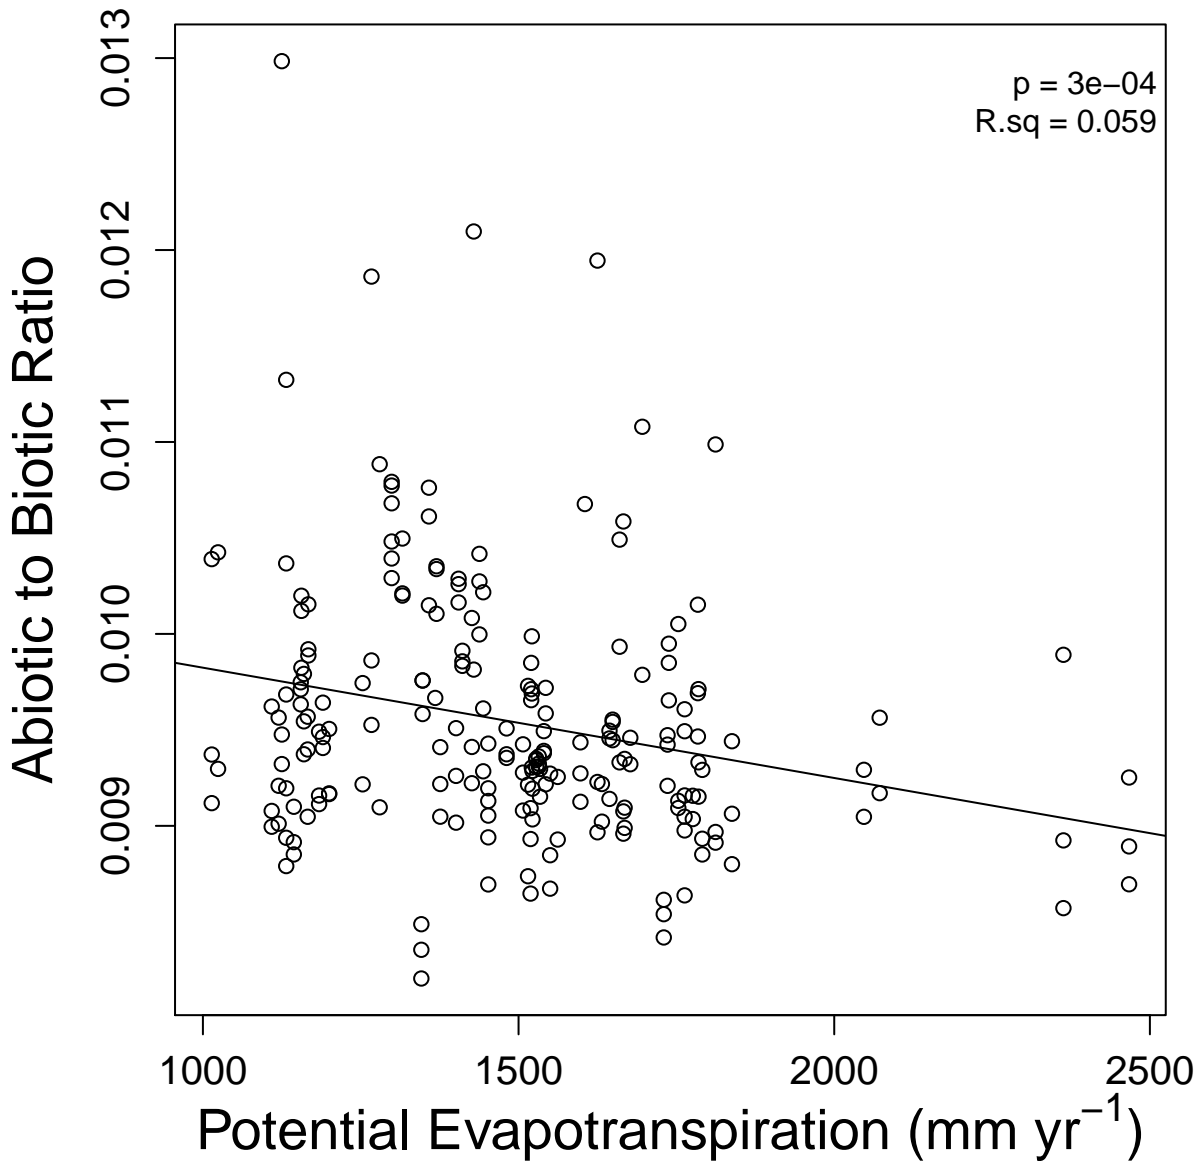

# Sediment

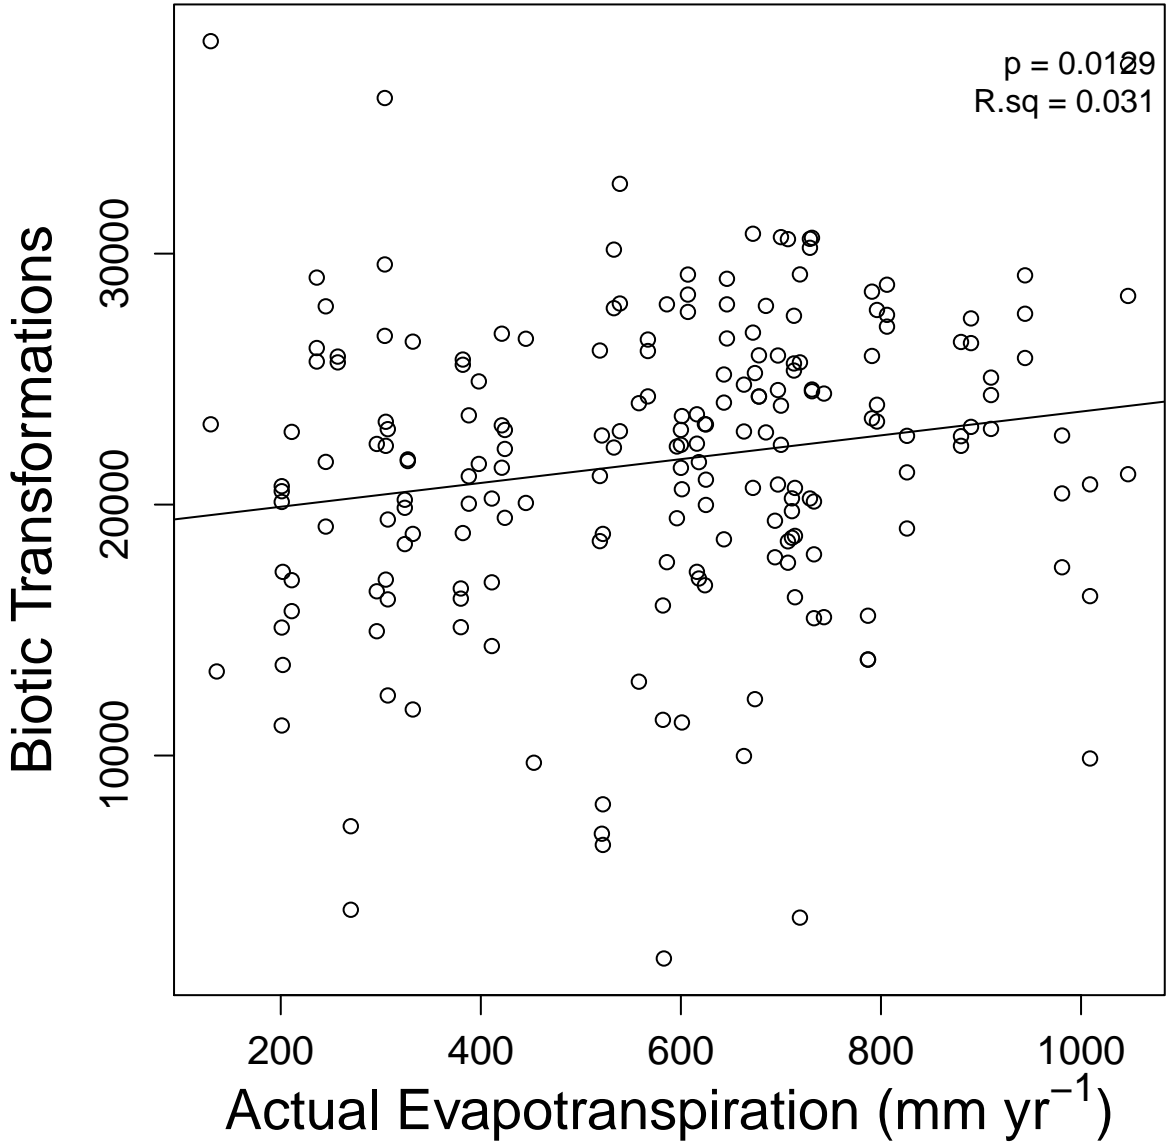

# Surface Water

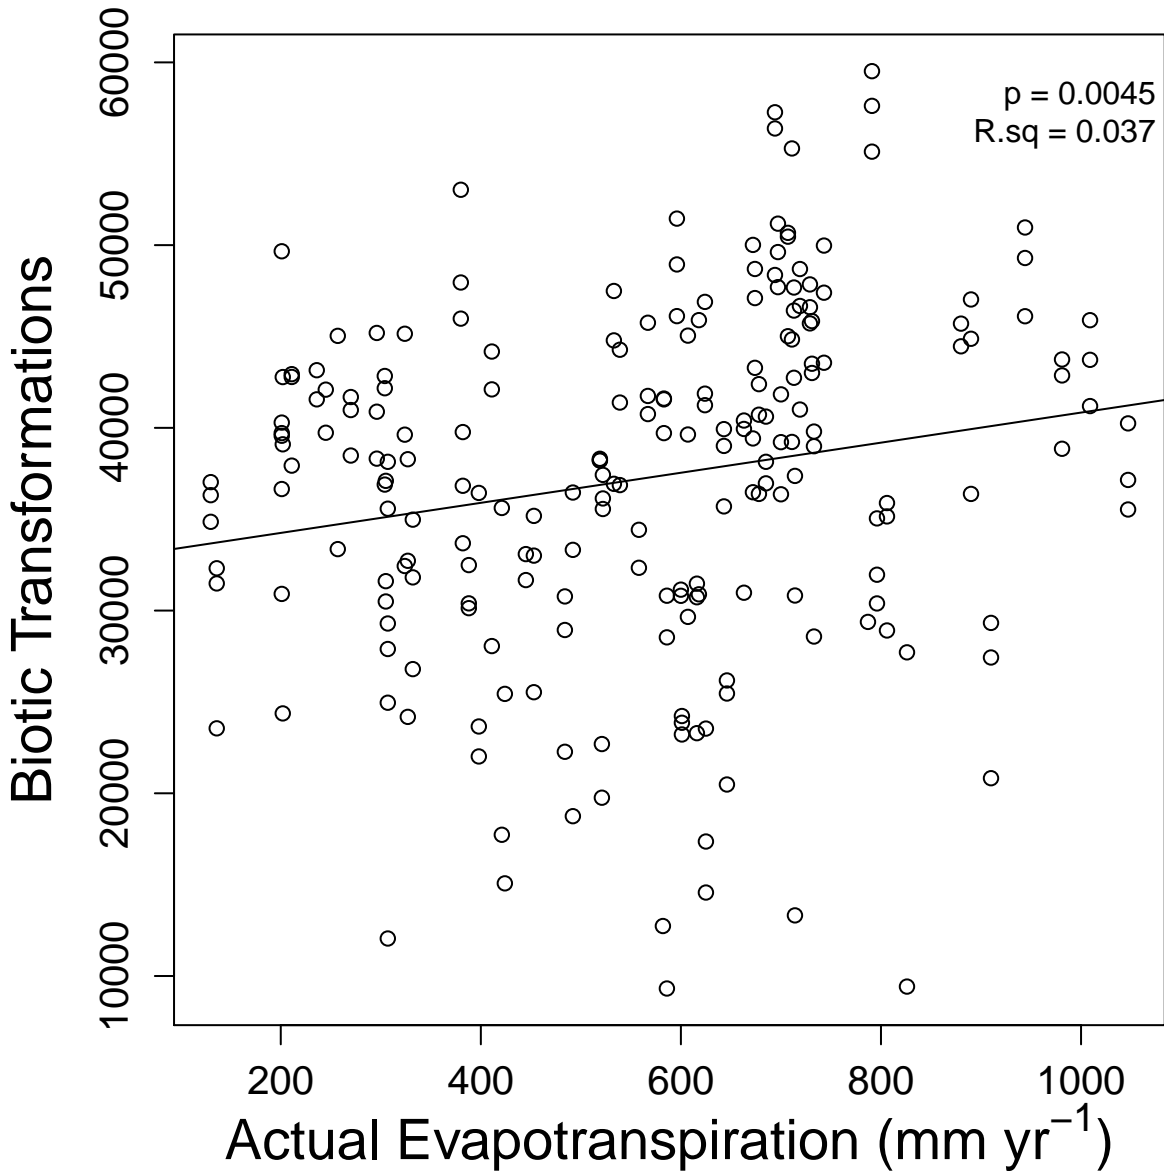

# Sediment

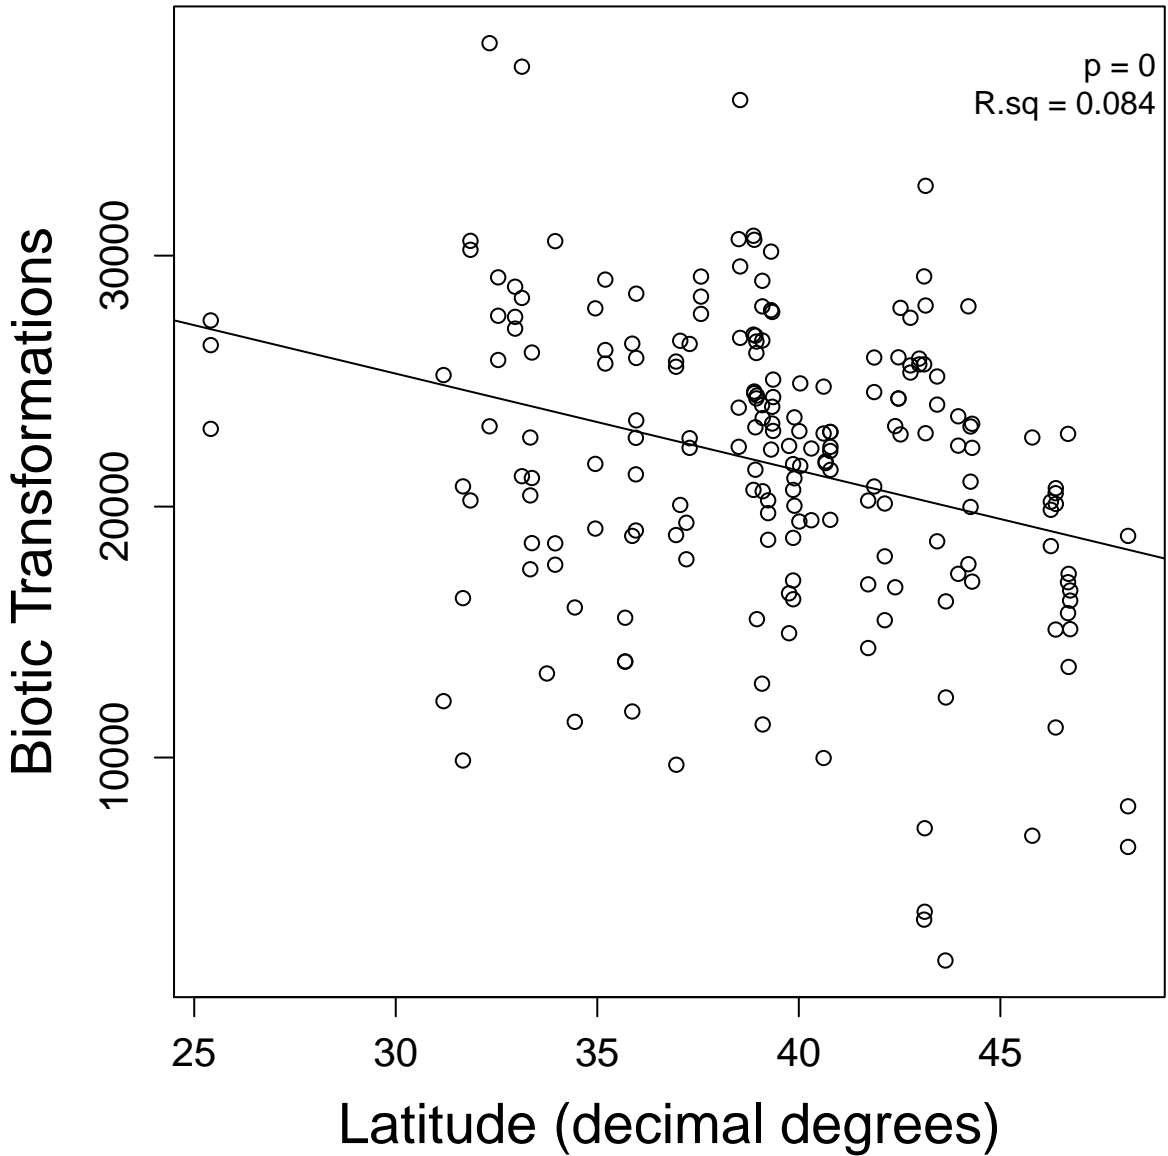

# Surface Water

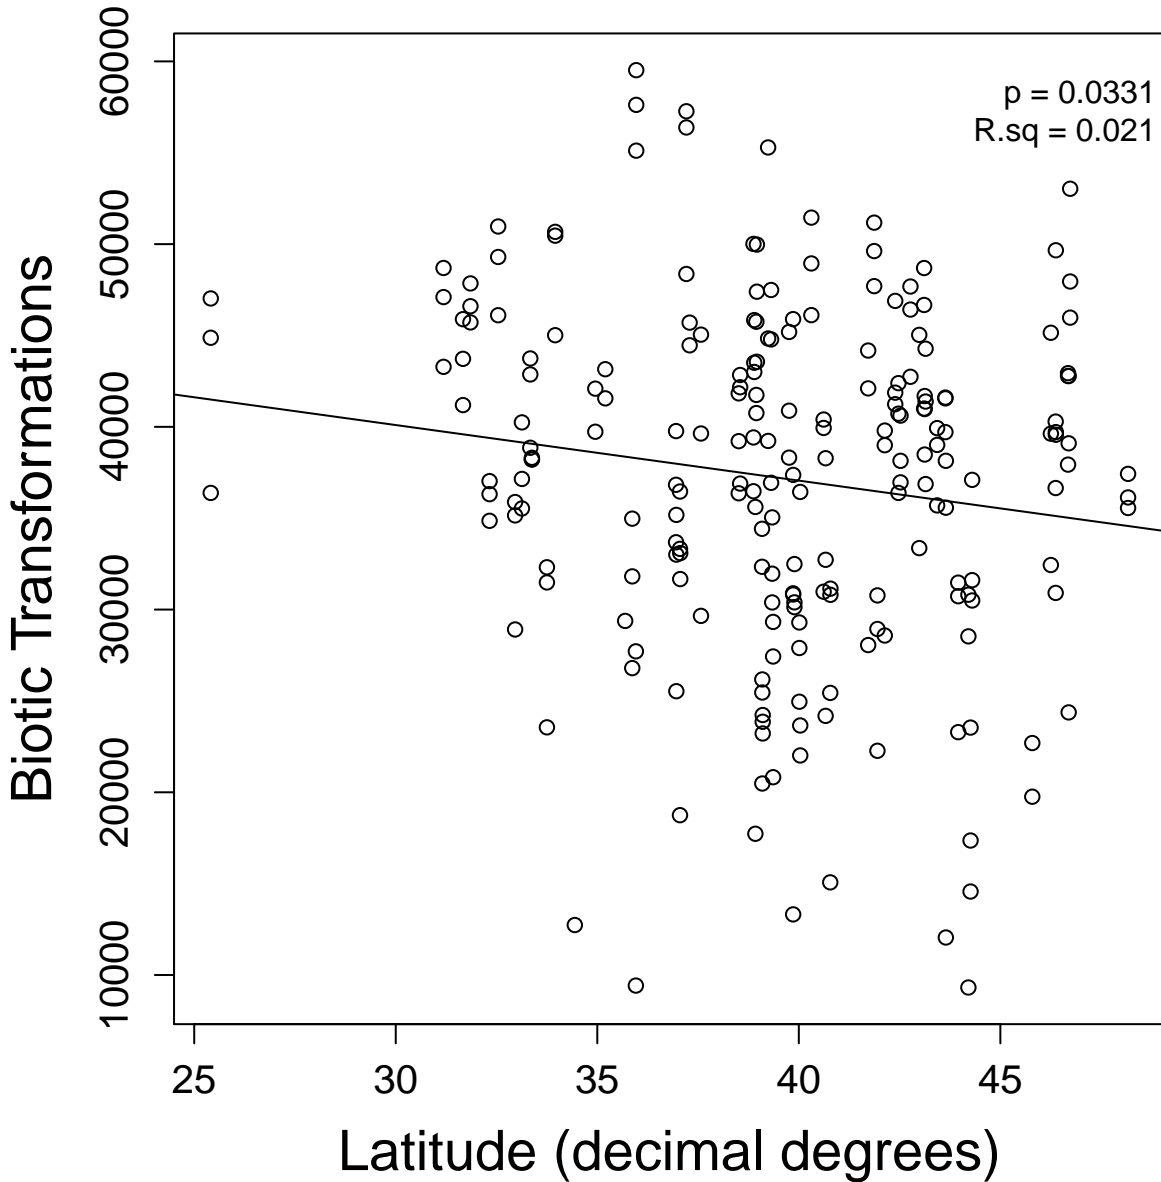

# Sediment

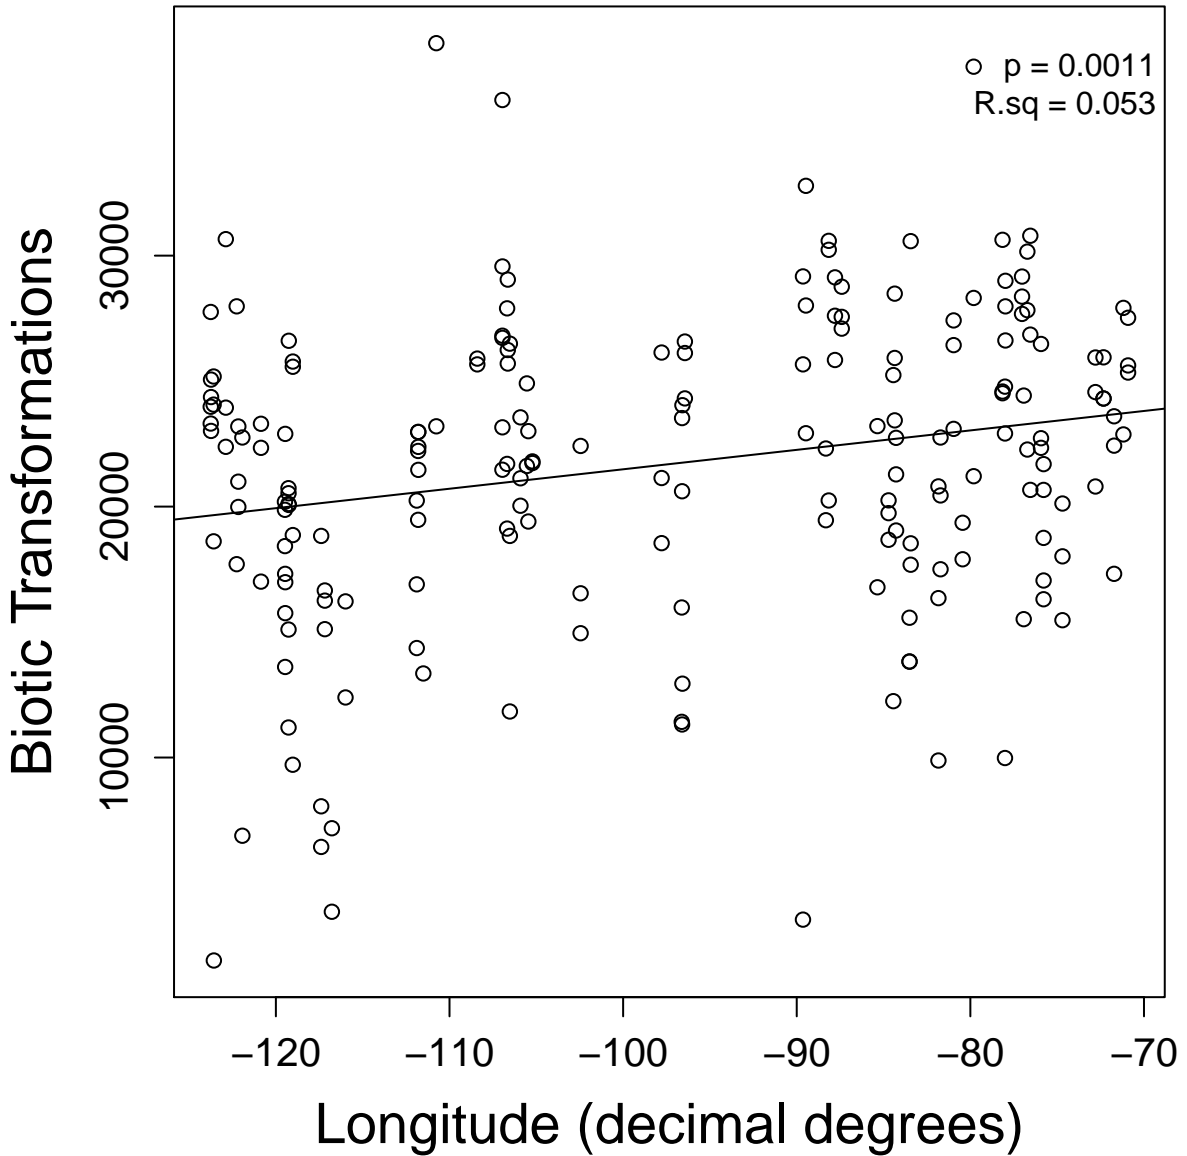

# Surface Water

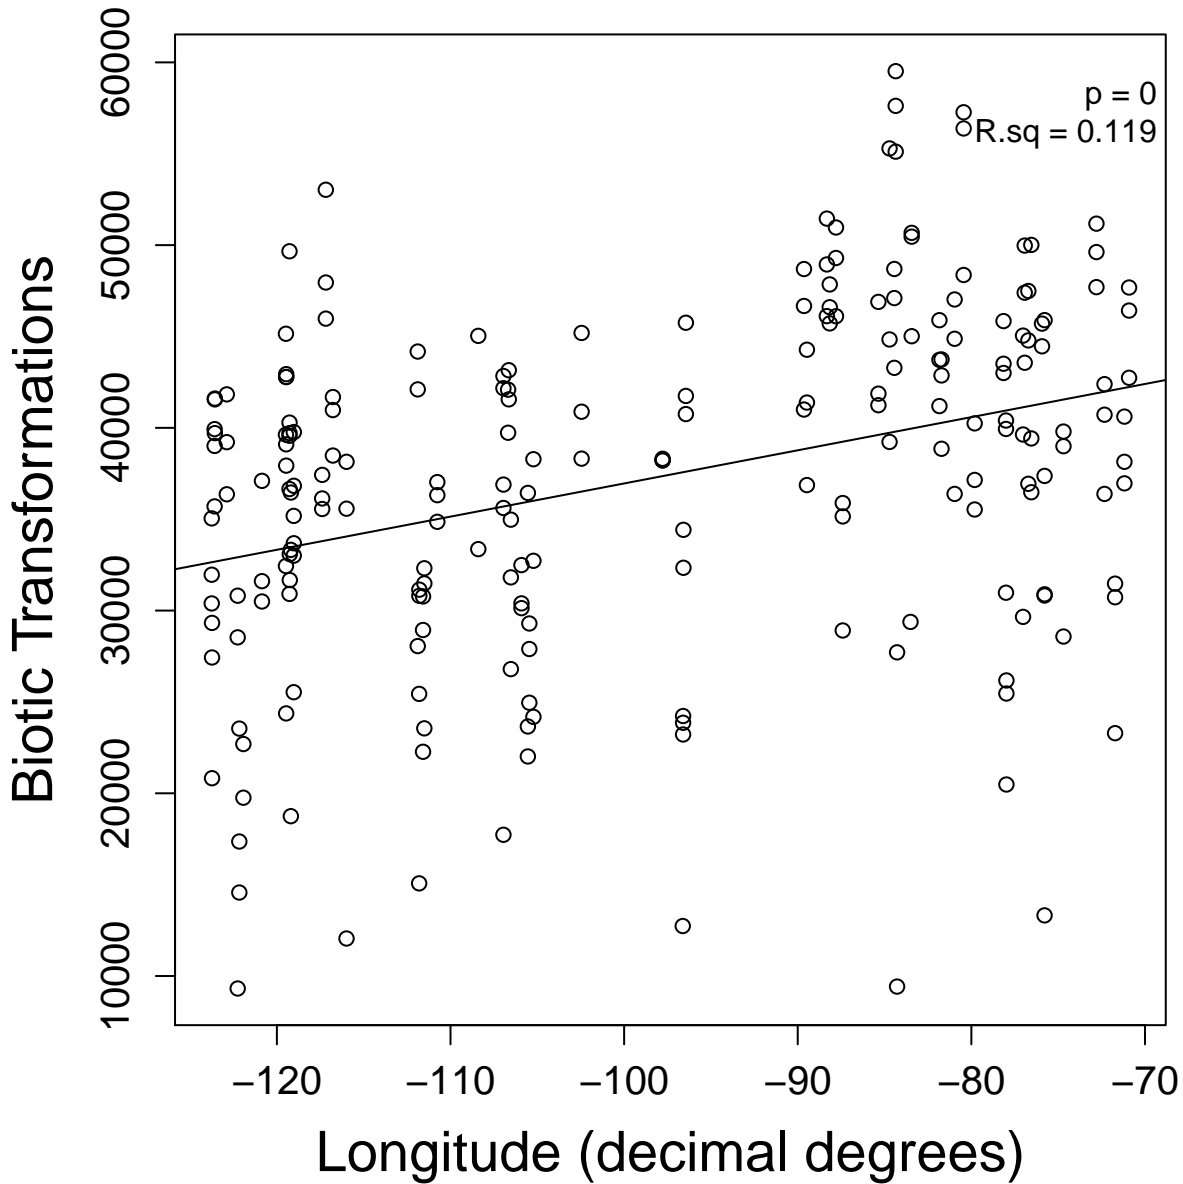



# Sediment

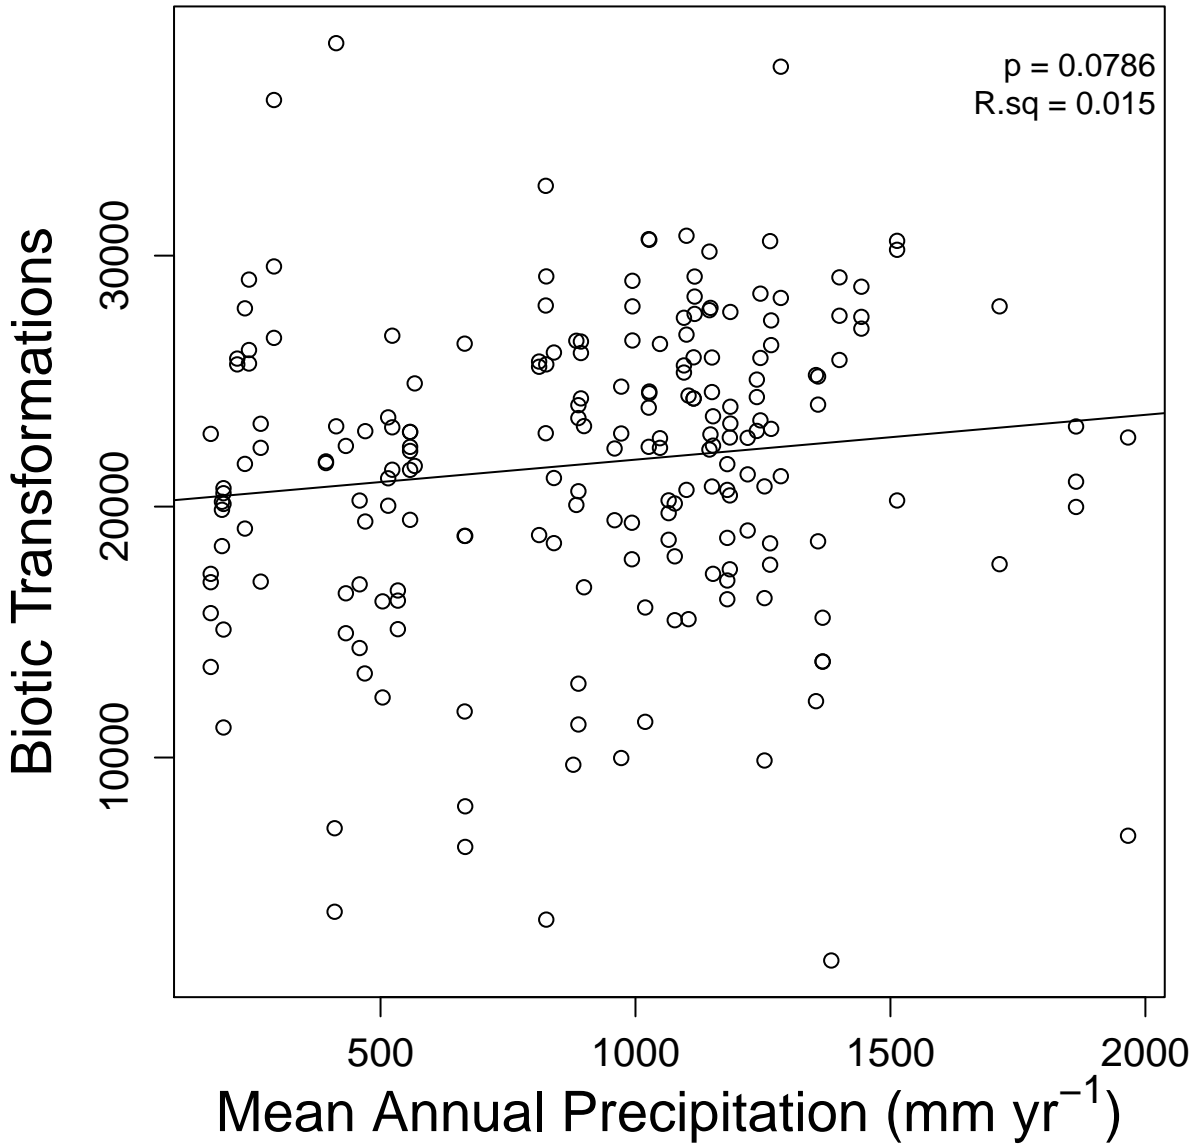

# Surface Water

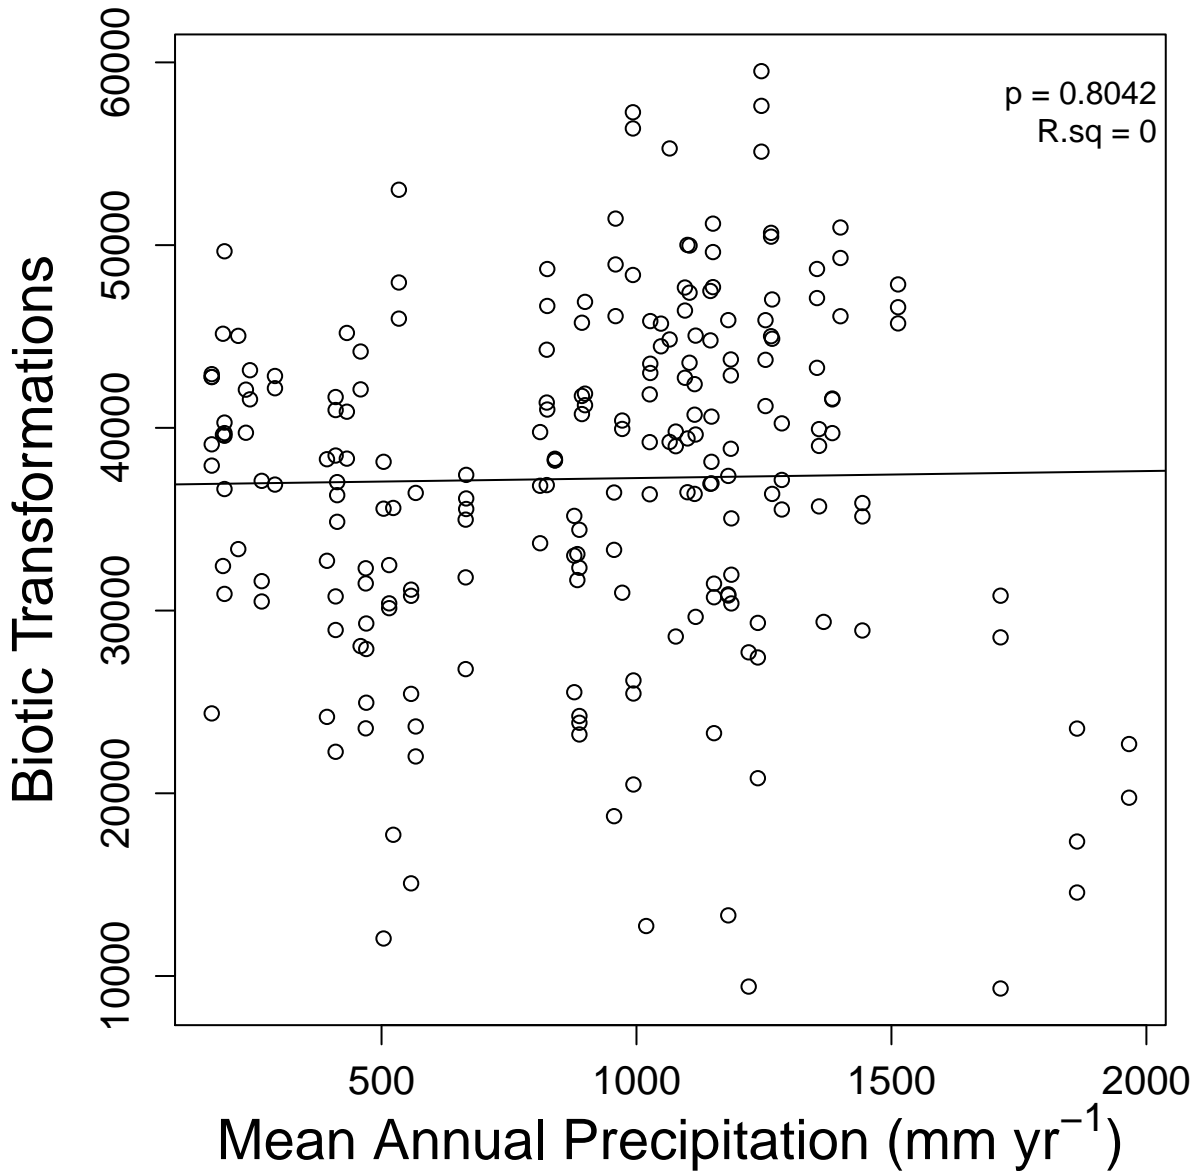

# Sediment

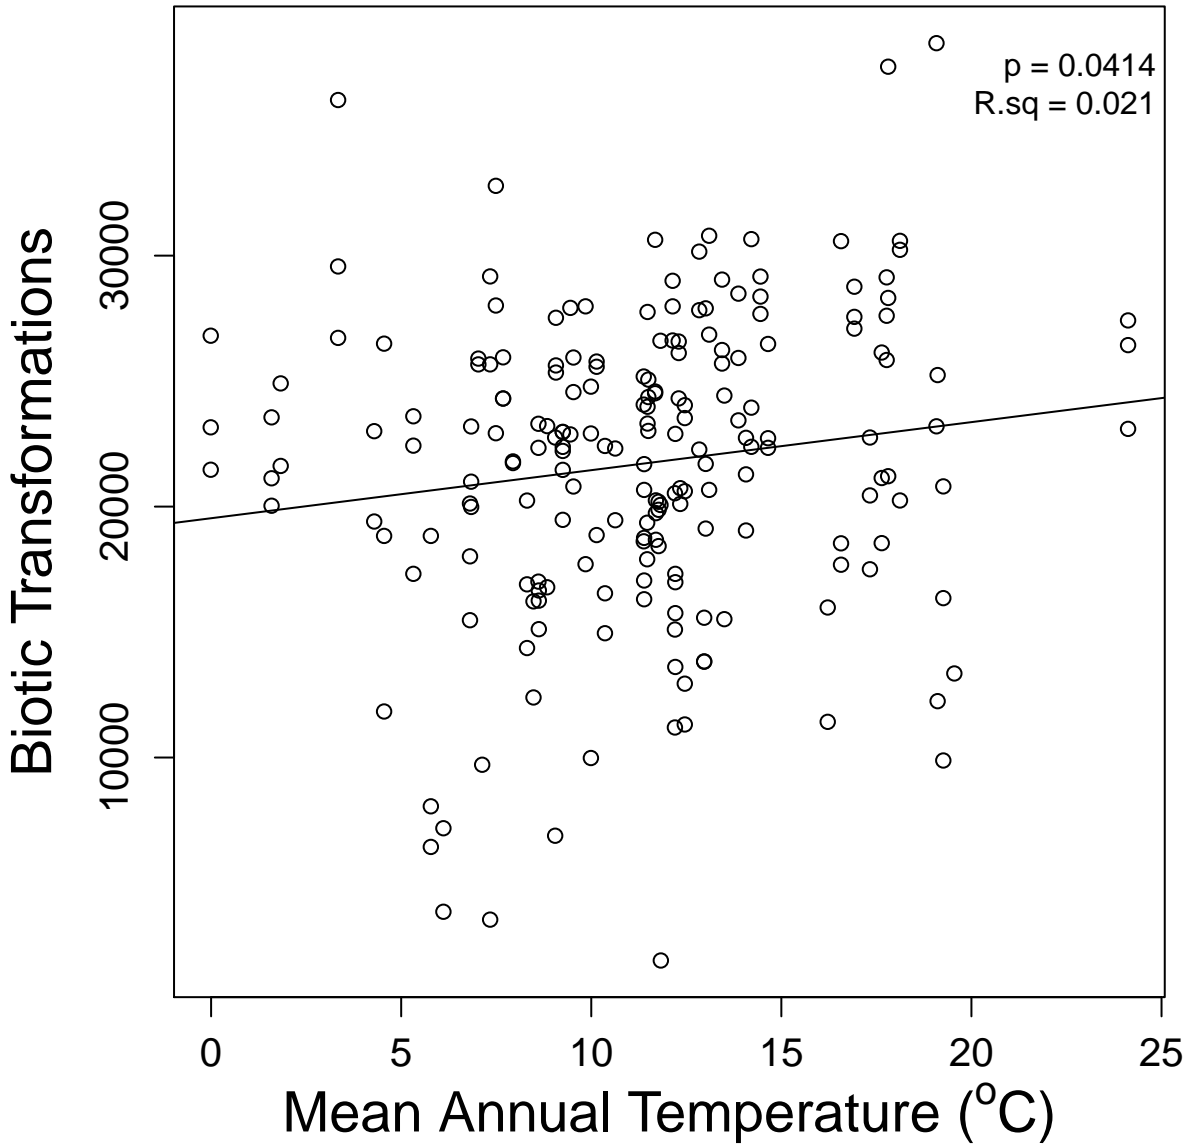

# Surface Water

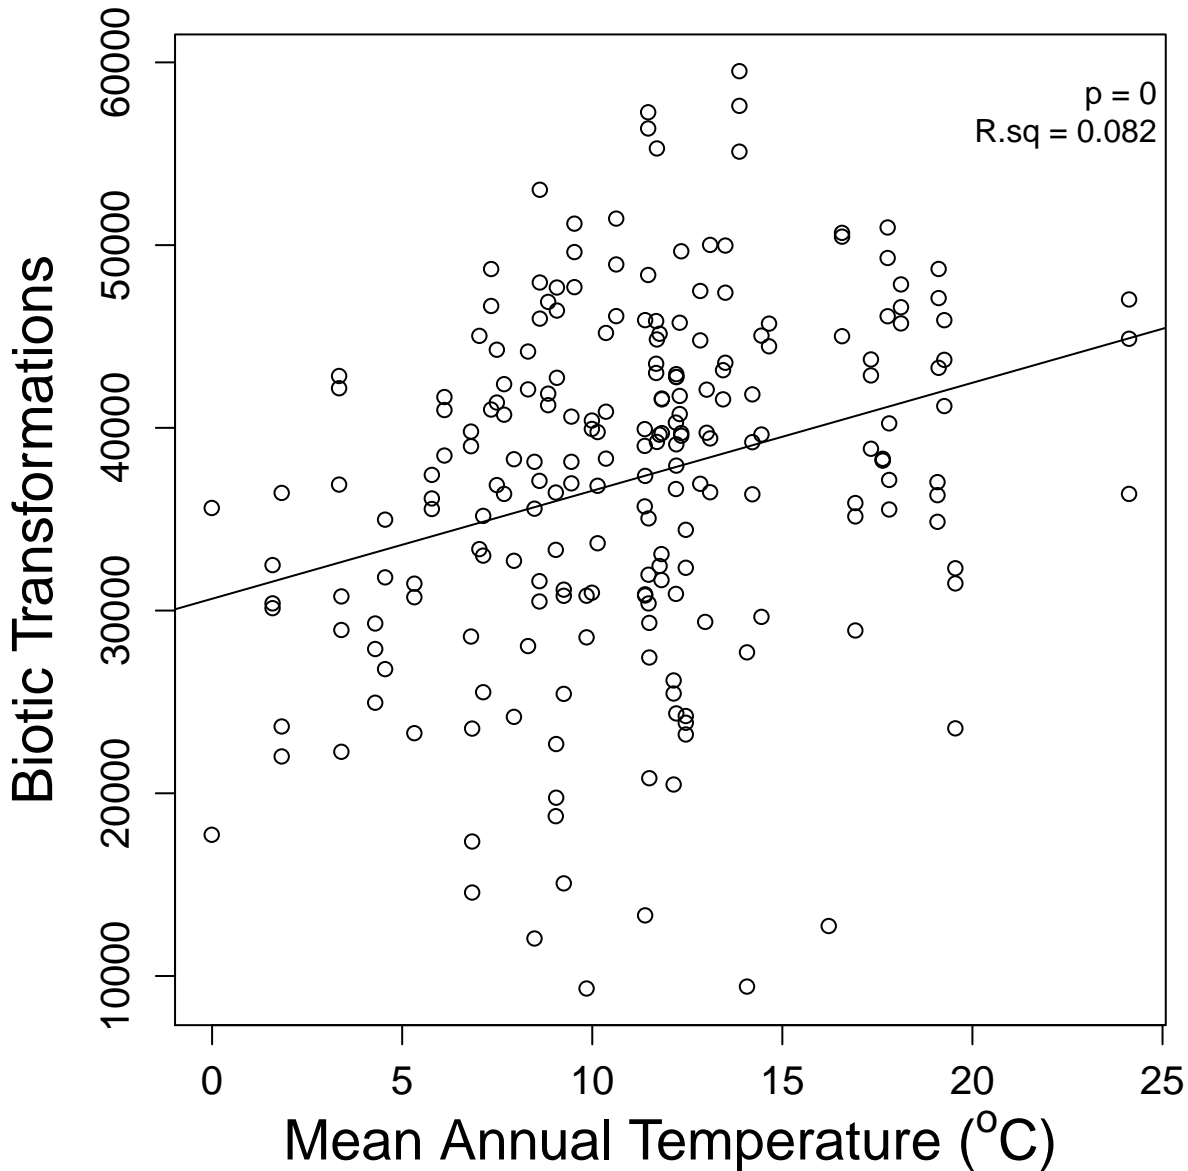

# Sediment

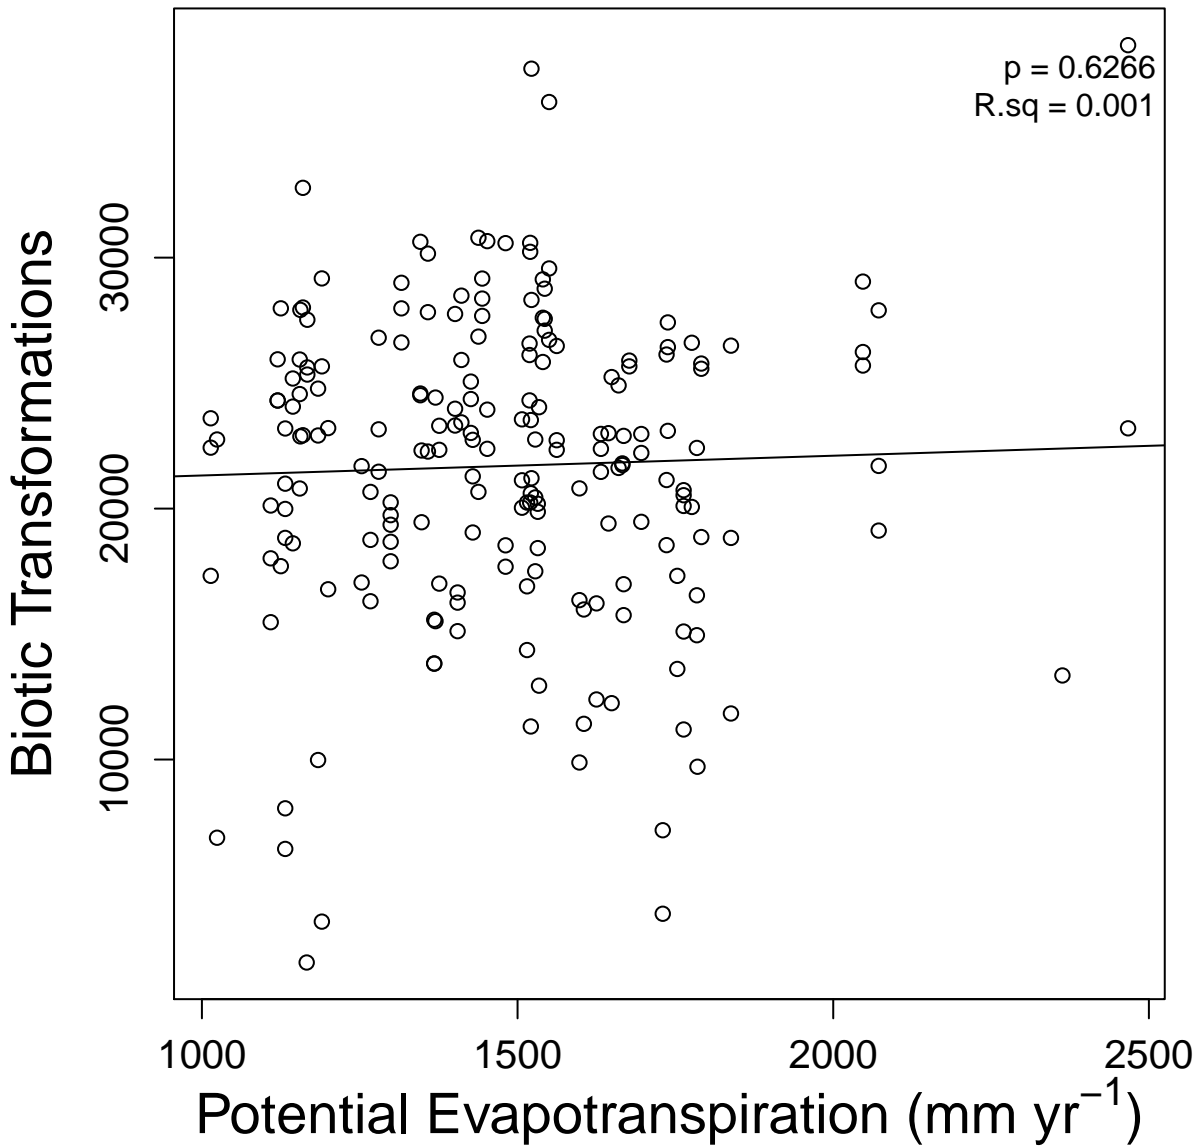

# Surface Water

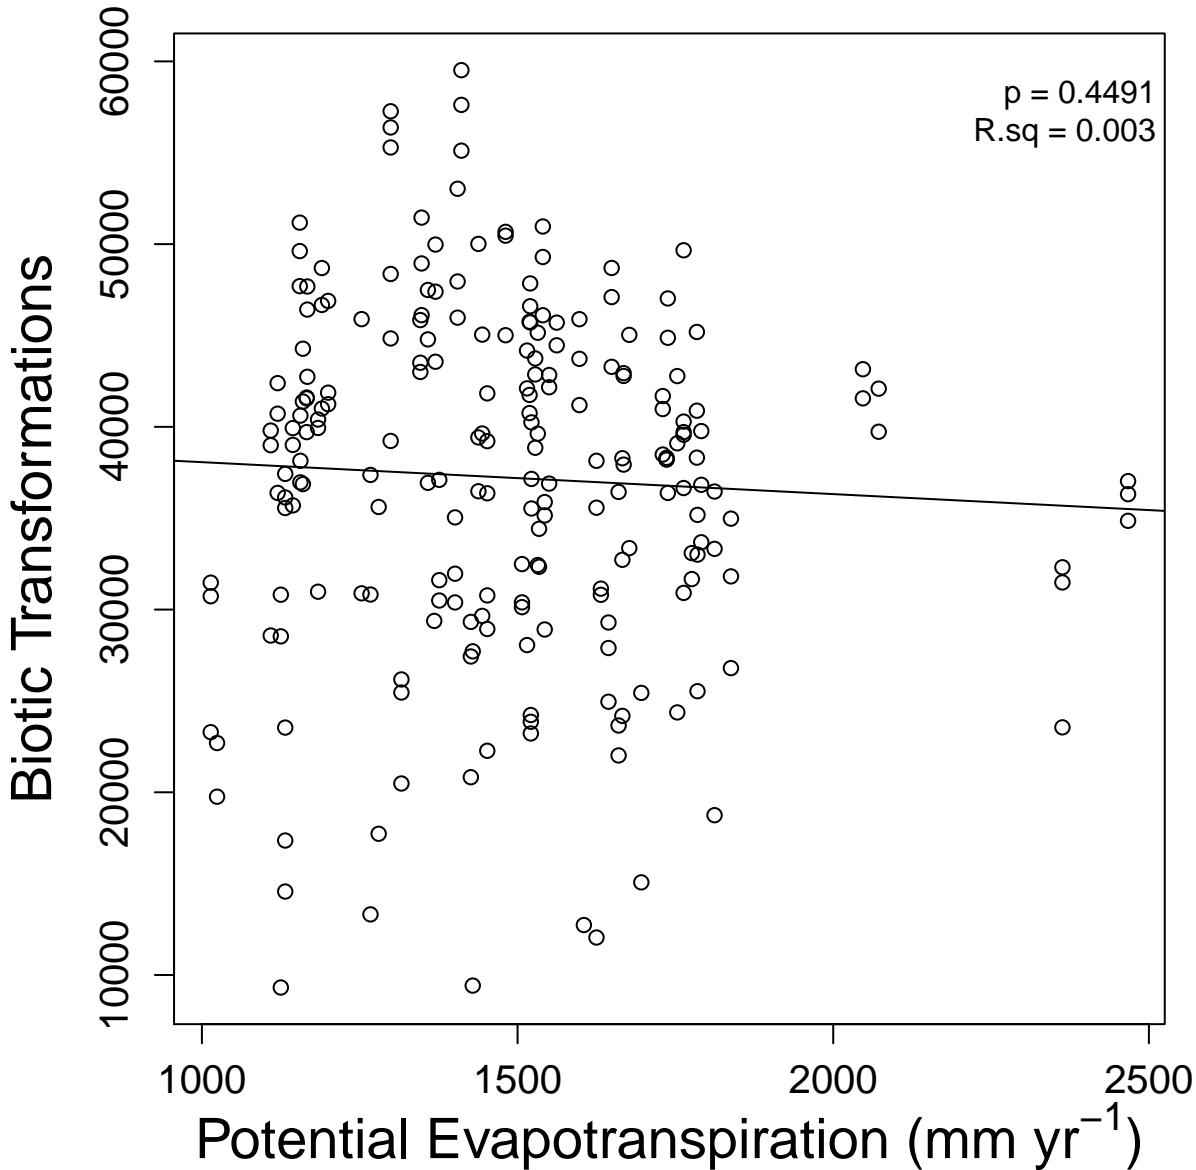

# Sediment

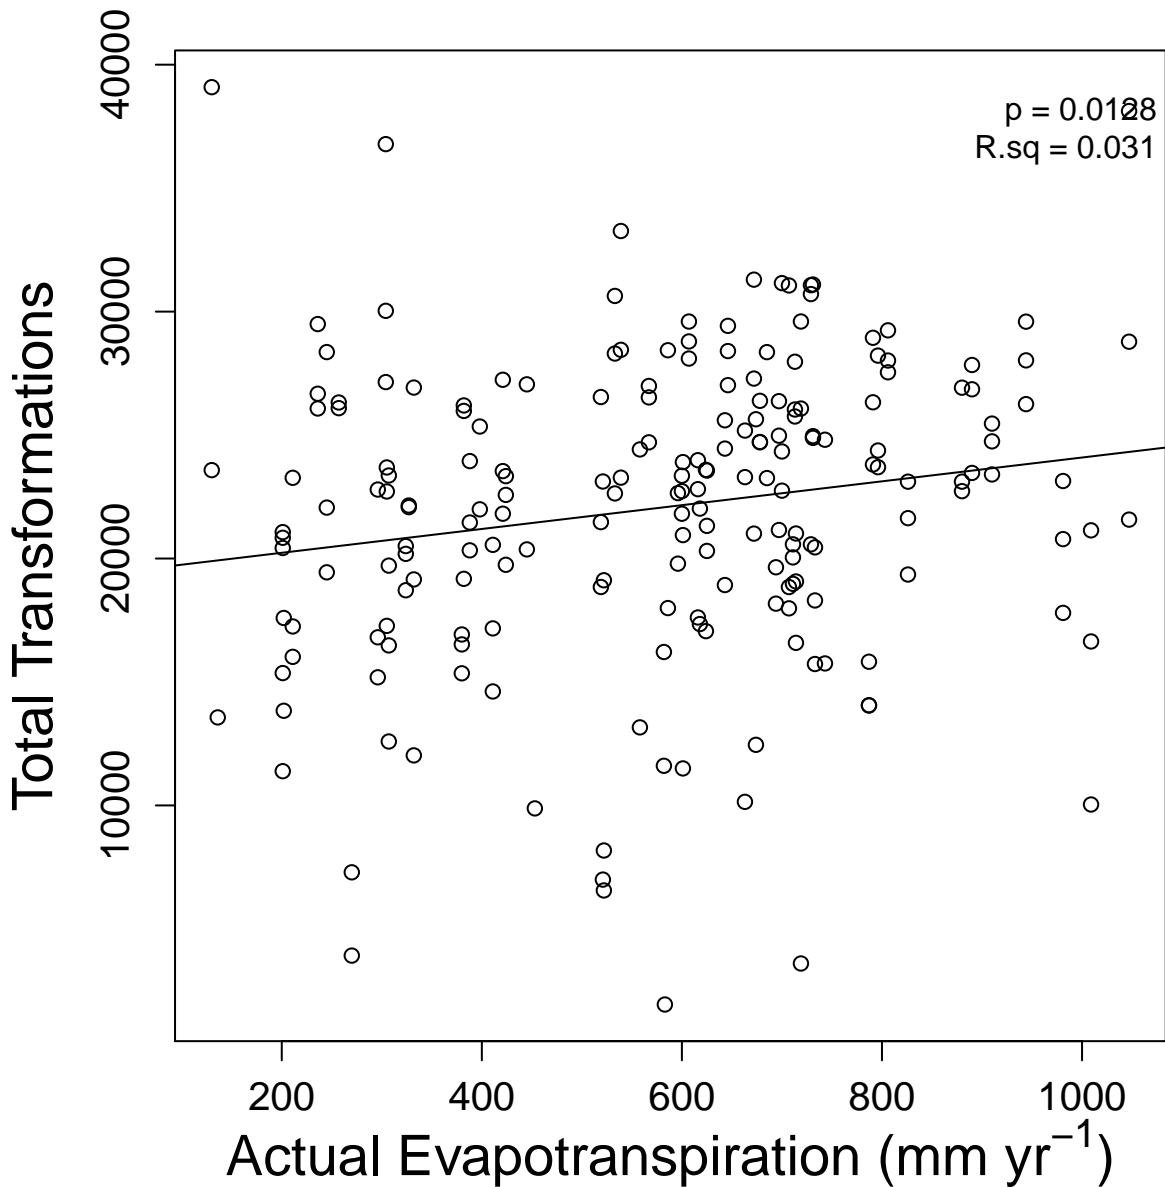

# Surface Water

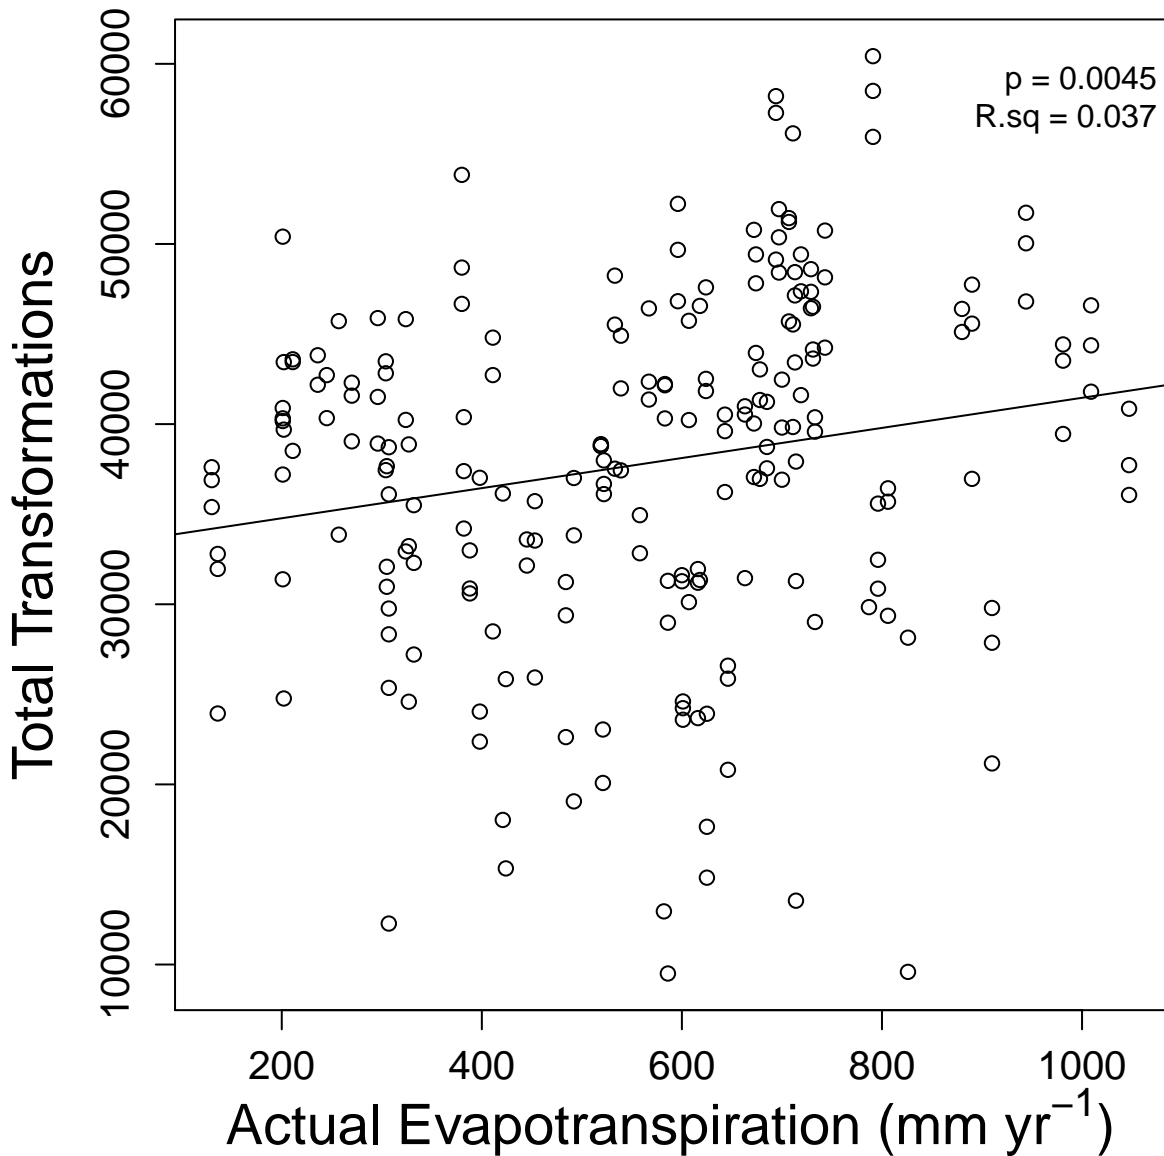



# Sediment

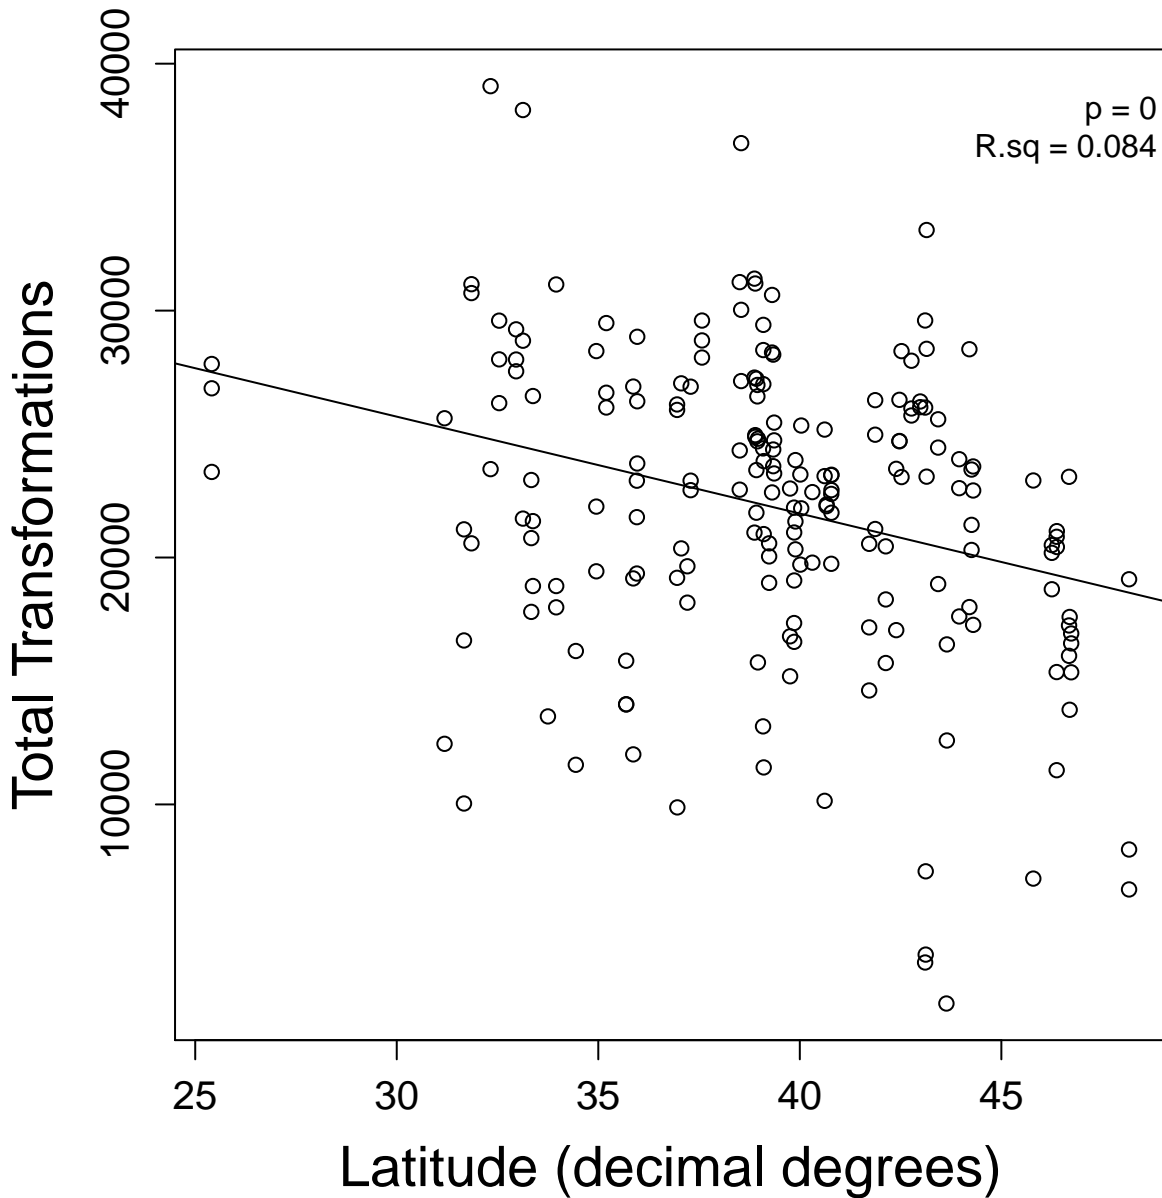

# Surface Water

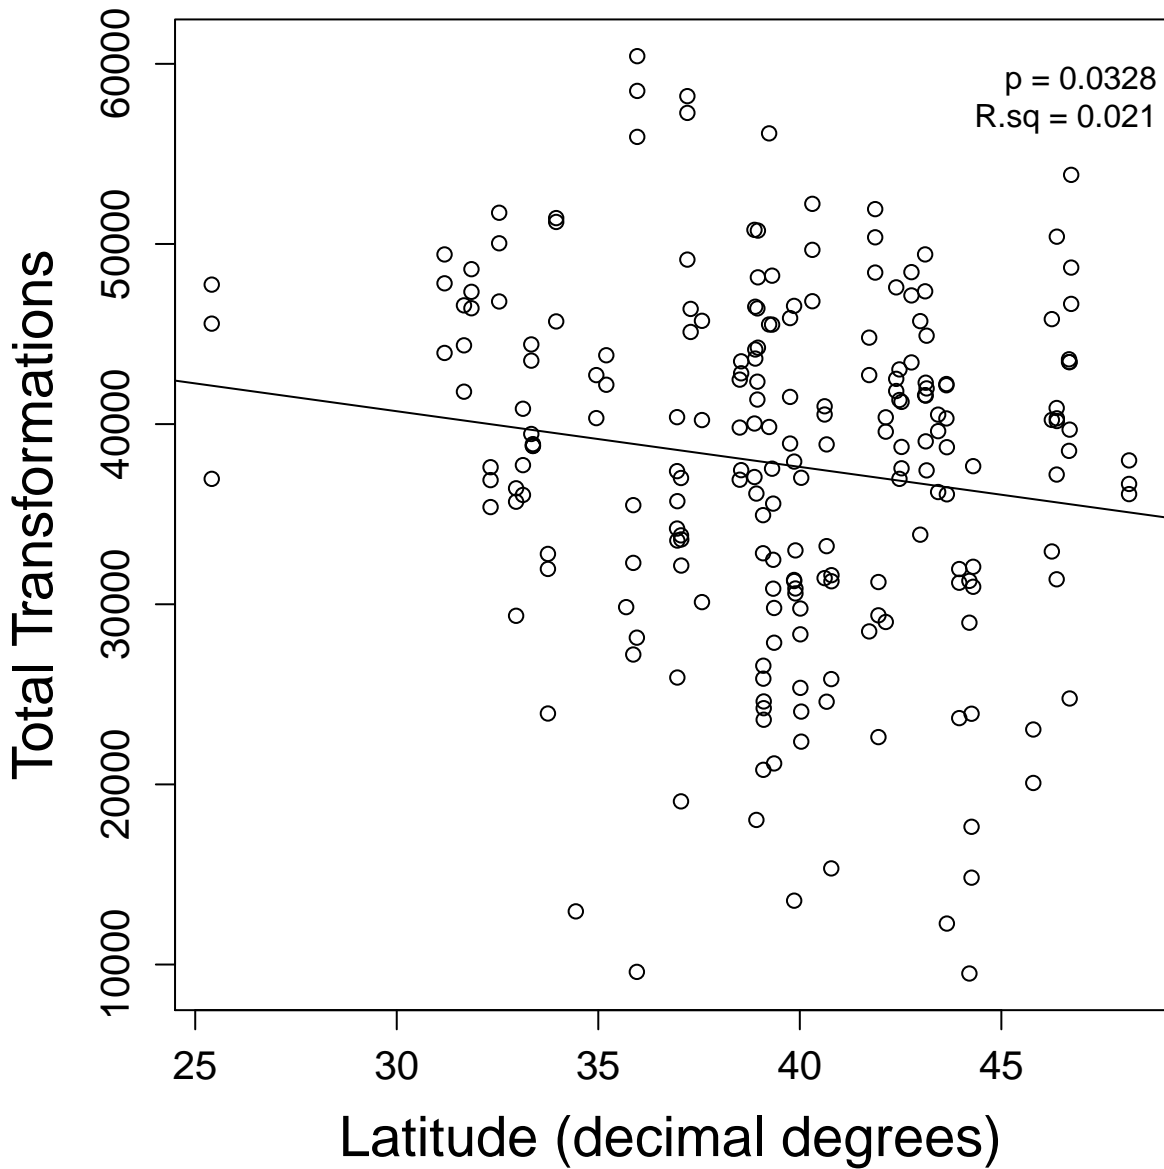

# Sediment

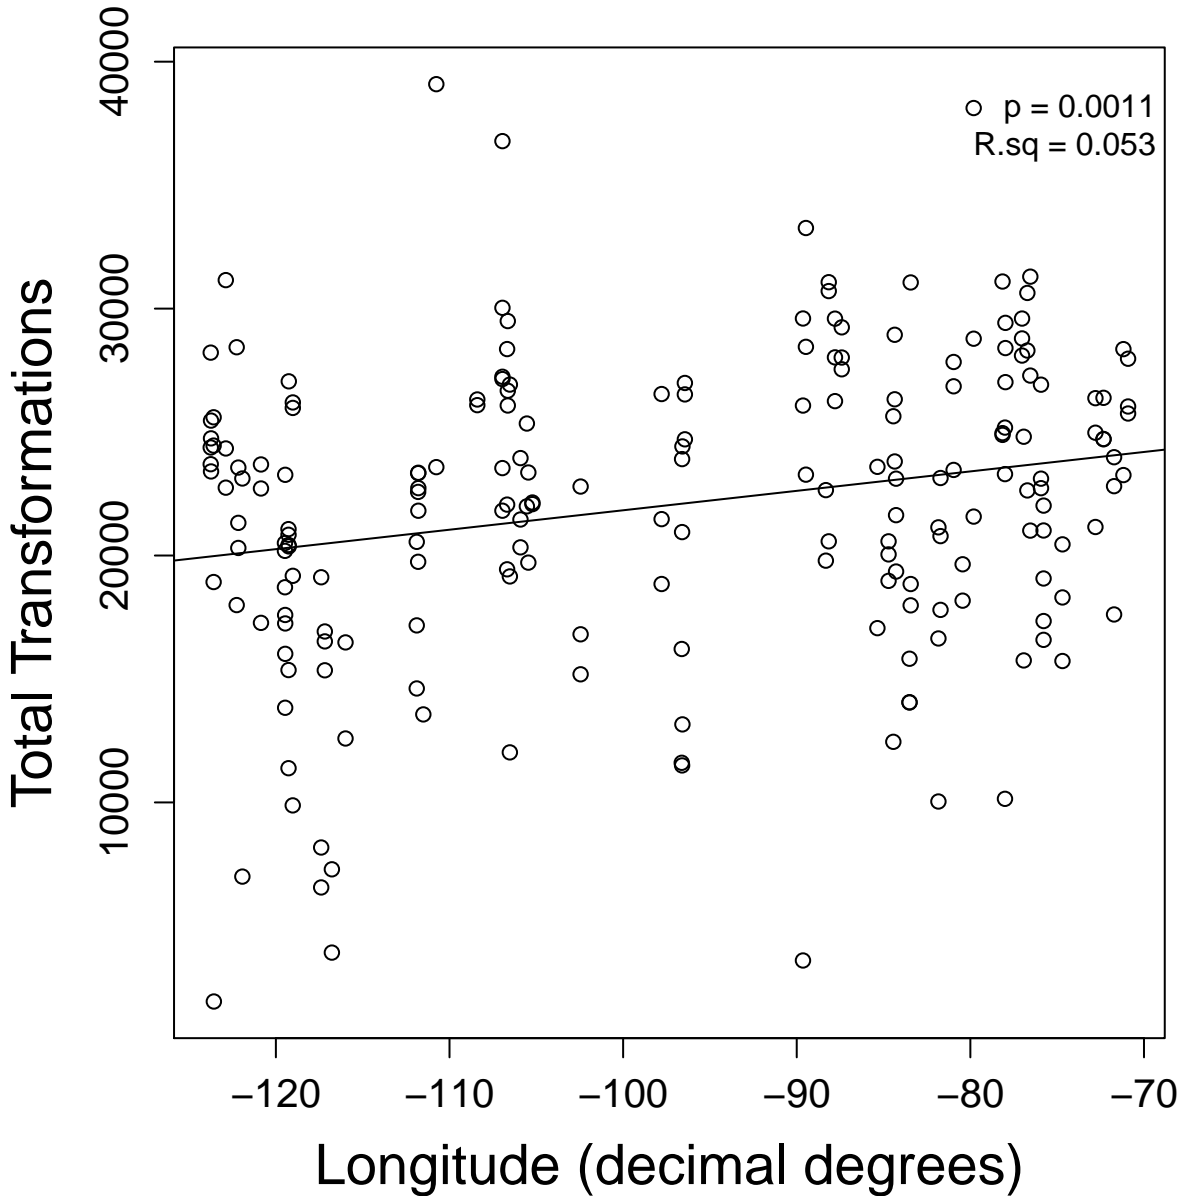

# Surface Water

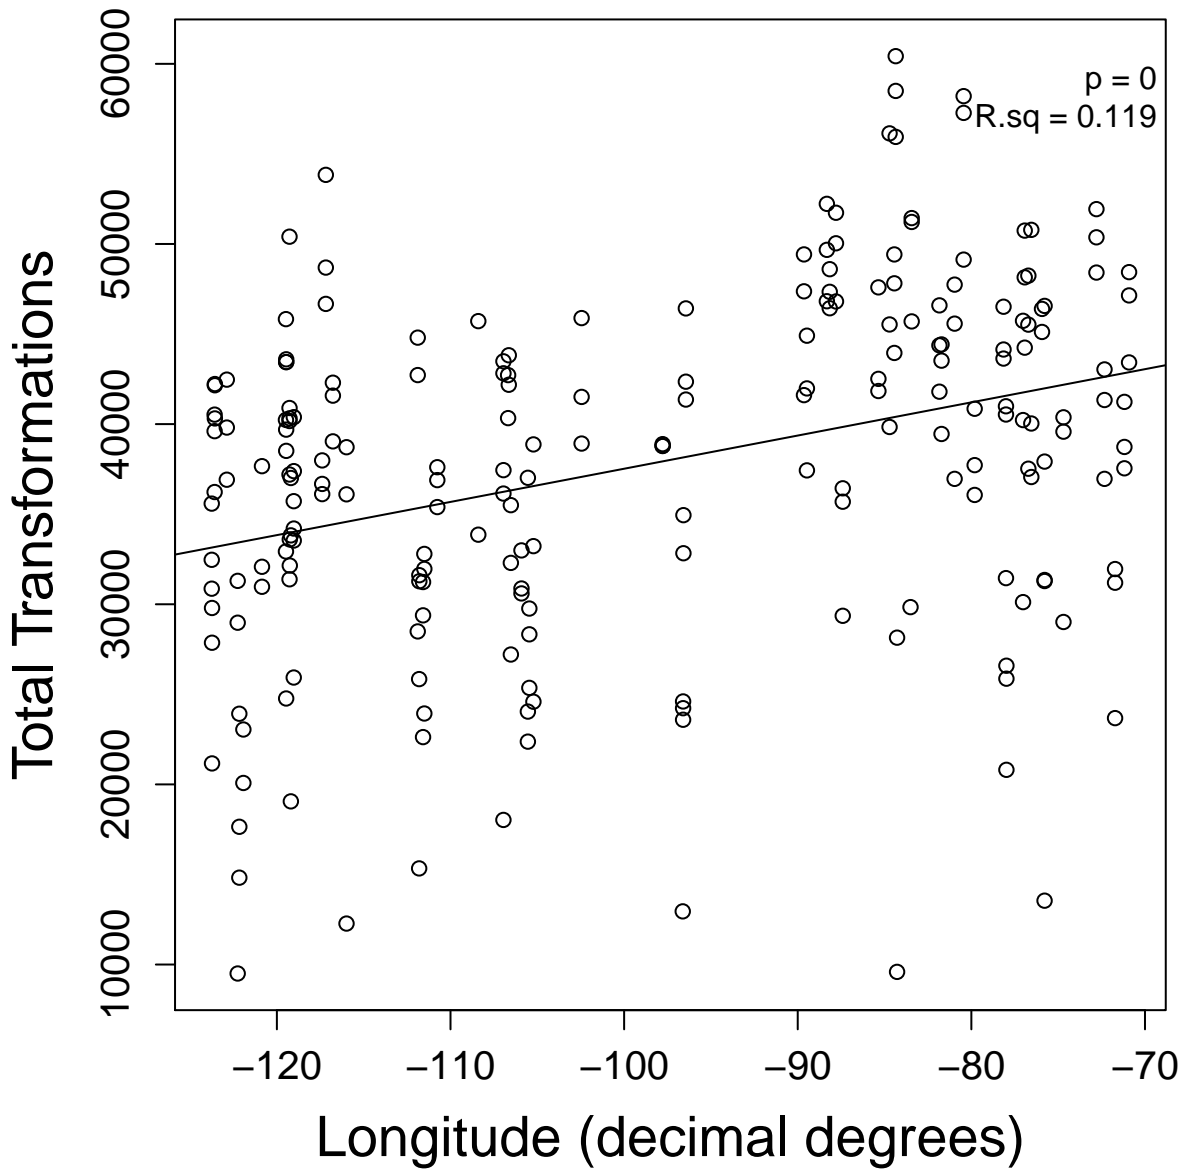

# Sediment

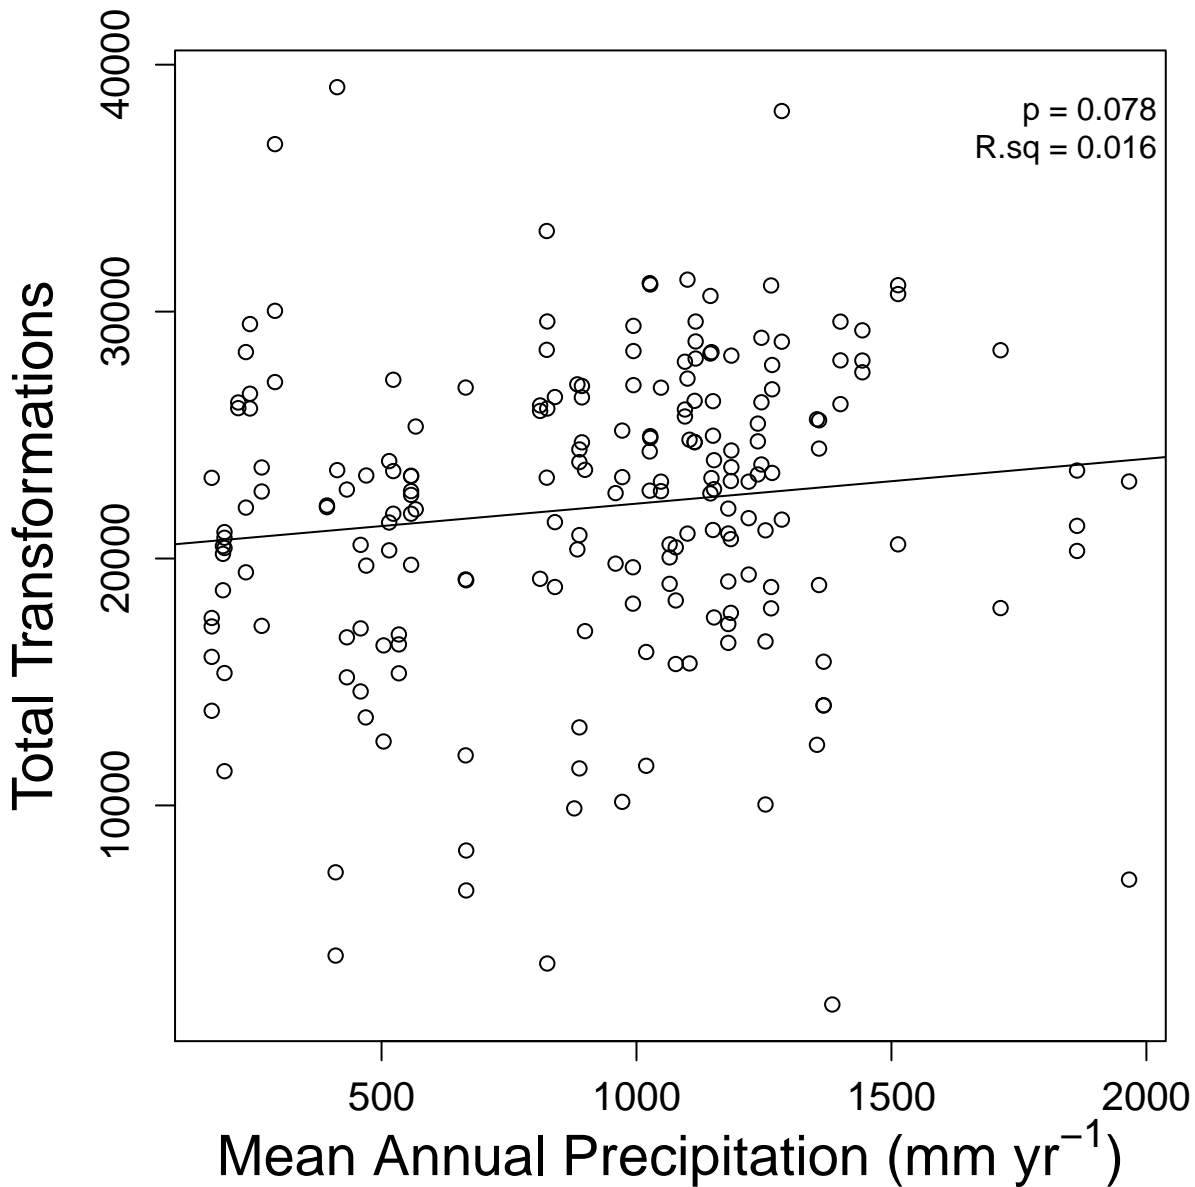

# Surface Water

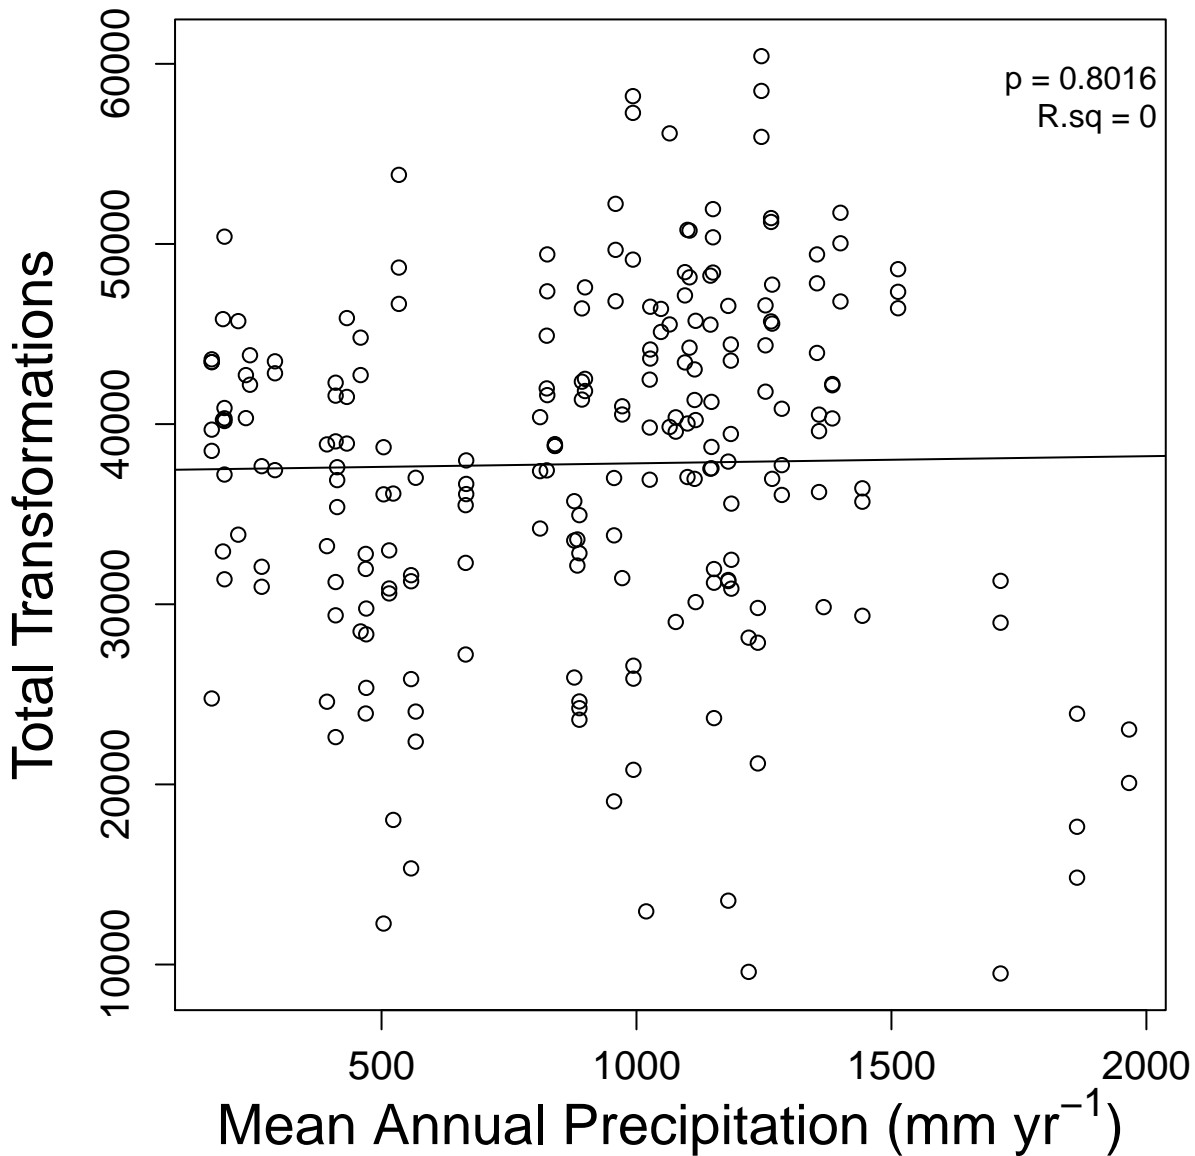

# Sediment

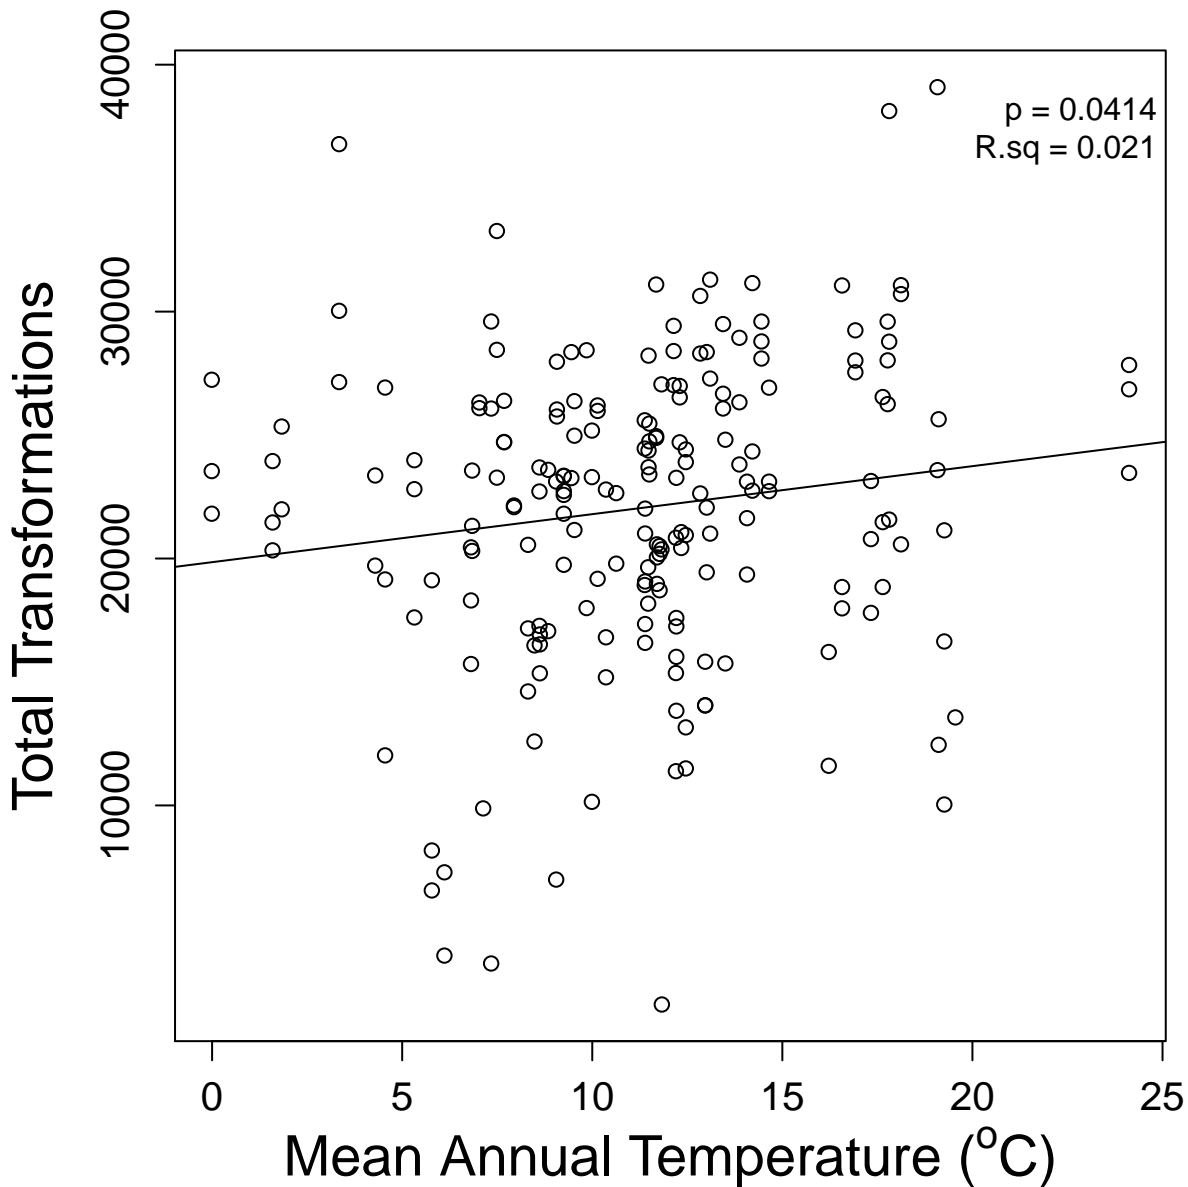

# Surface Water

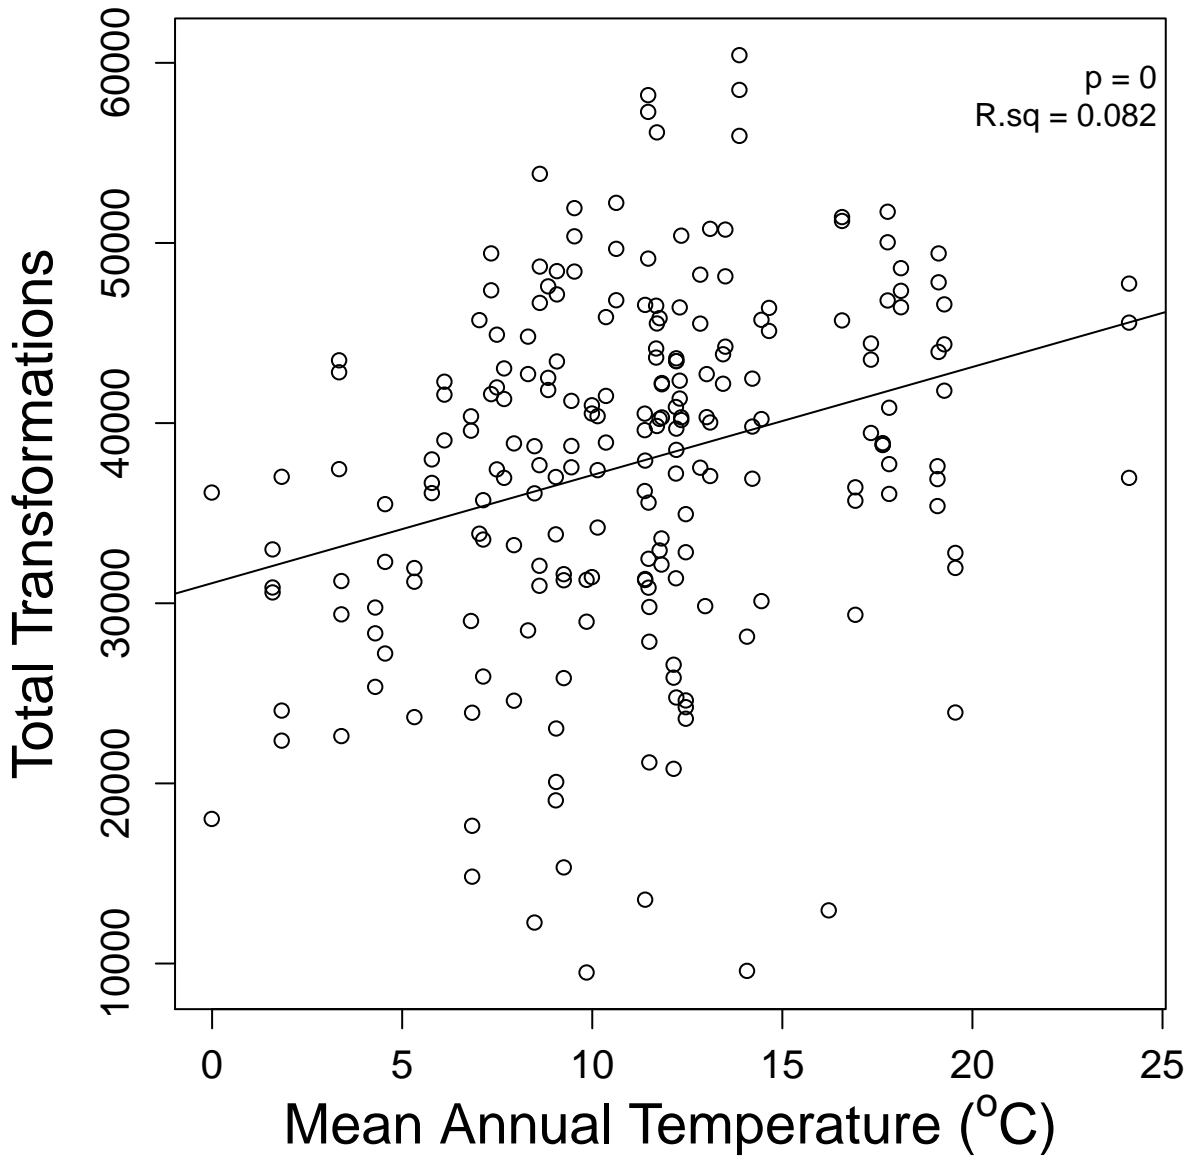



# Sediment

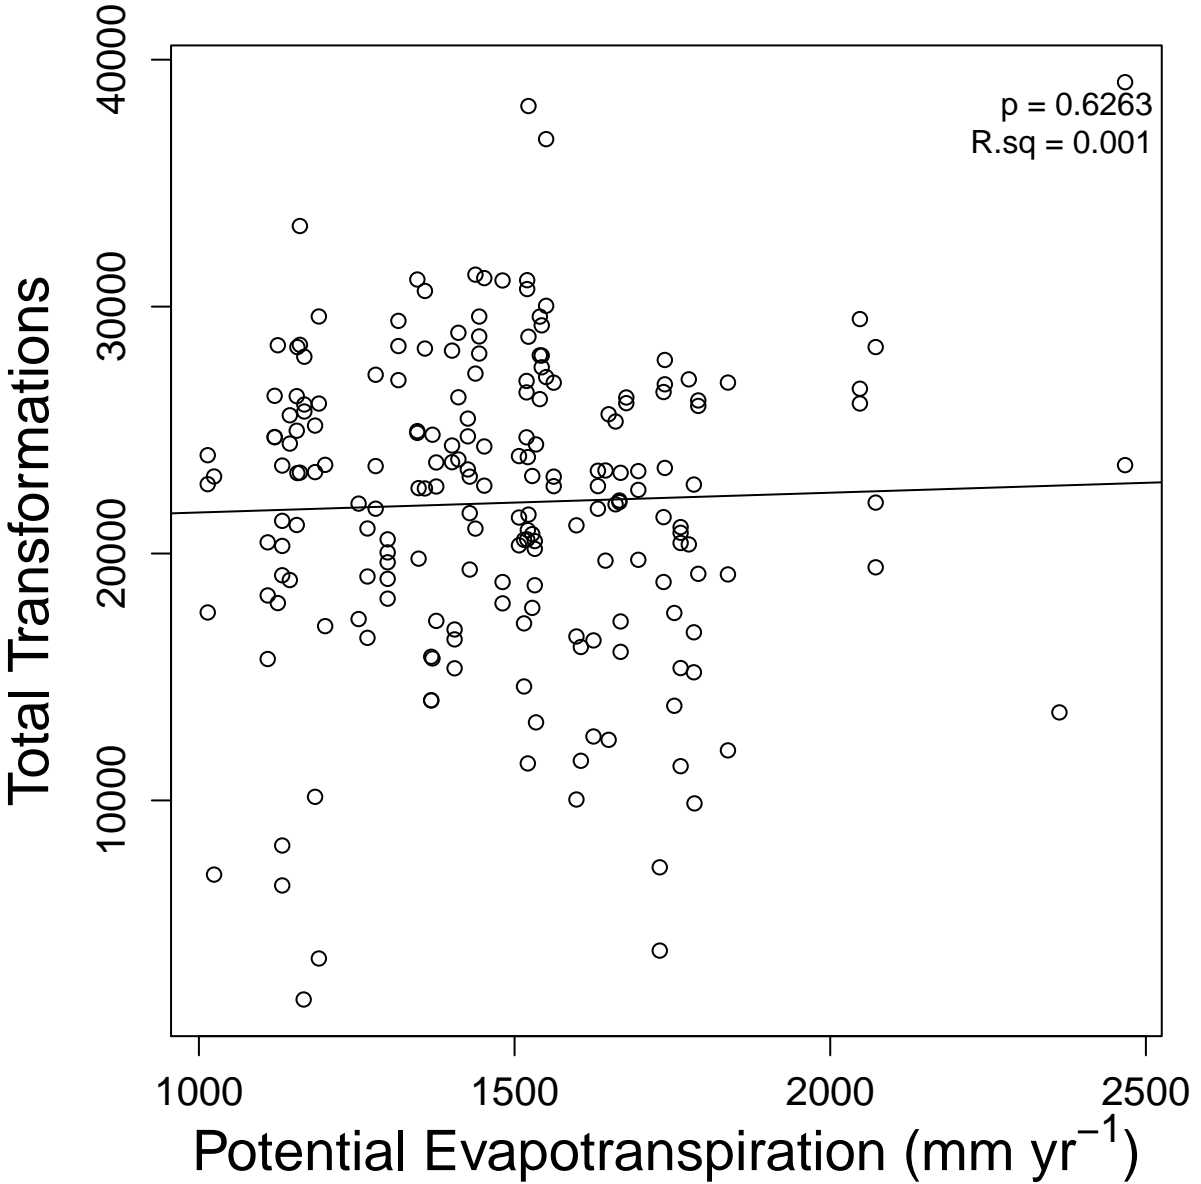

# Surface Water

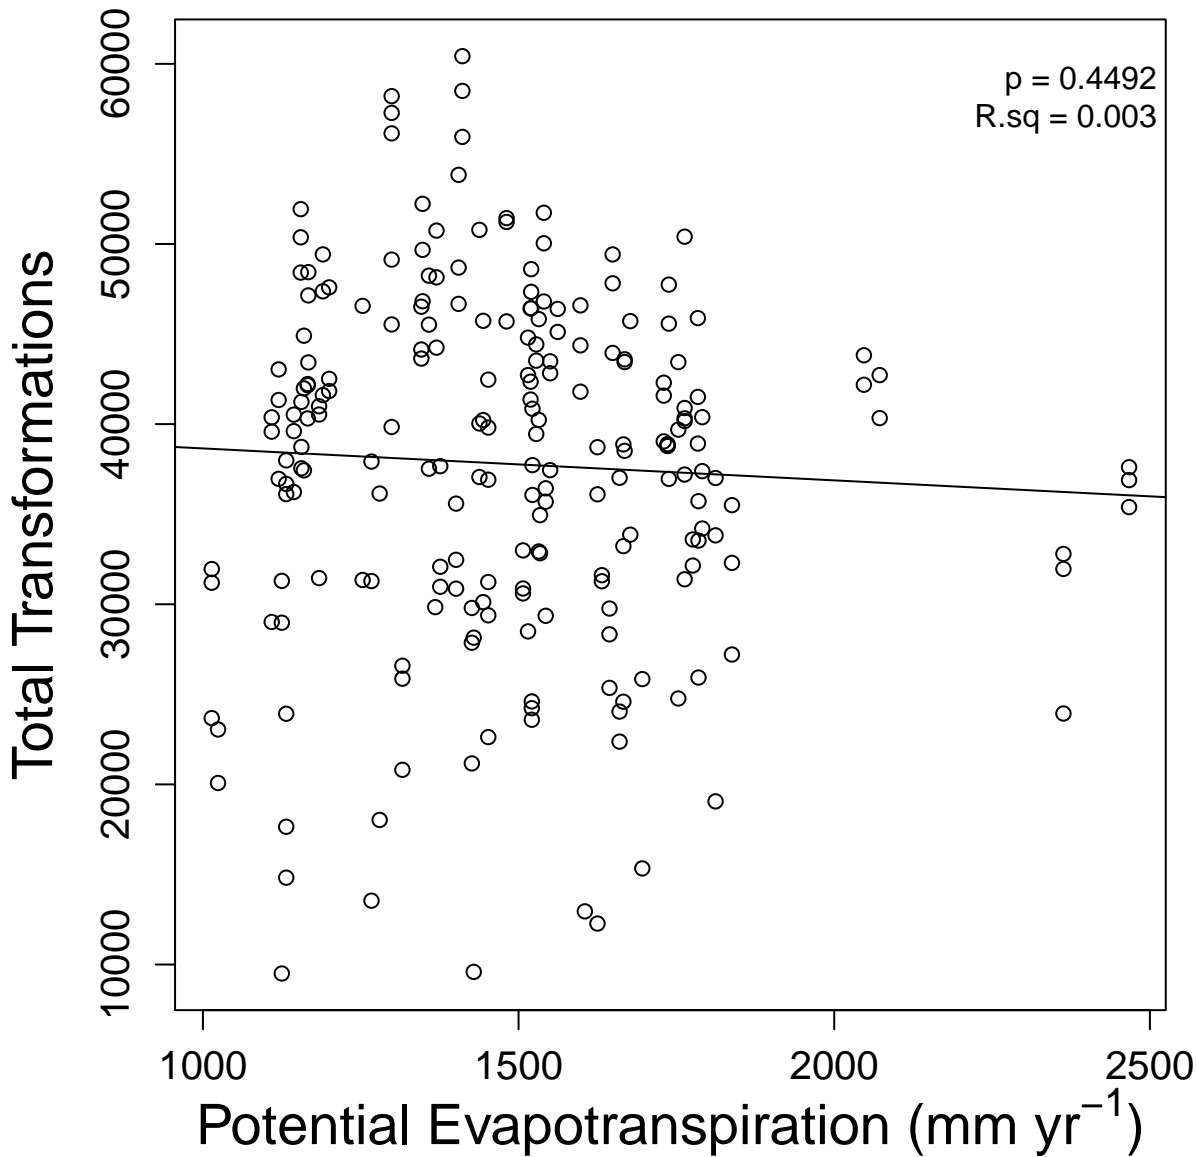

Supplement: Supplementary file 1 [file bg-2022-19-supplement.pdf]
